1 **GRAMD1C regulates autophagy initiation and mitochondrial bioenergetics**  
2 **through ER-mitochondria cholesterol transport**

3

4

5 Matthew Yoke Wui Ng<sup>1,2,\*</sup>, Chara Charsou<sup>1,2</sup>, Ana Lapao<sup>1,2</sup>, Sakshi Singh<sup>1,2</sup>, Laura Trachsel-Moncho<sup>1,2</sup>,

6 Sigve Nakken<sup>2,3</sup>, Michael J. Munson<sup>1,2,§</sup>, Anne Simonsen<sup>1,2,4,#,\*</sup>

7 <sup>1</sup>Department of Molecular Medicine, Institute of Basic Medical Sciences, University of Oslo, Oslo,  
8 Norway; <sup>2</sup>Centre for Cancer Cell Reprogramming, Institute of Clinical Medicine, University of Oslo,  
9 Oslo, Norway; <sup>3</sup>Department of Tumor Biology, Institute for Cancer Research, Oslo University Hospital  
10 Montebello, 0379 Oslo, Norway; <sup>4</sup>Department of Molecular Cell Biology, Institute for Cancer Research,  
11 Oslo University Hospital Montebello, 0379 Oslo, Norway

12

13

14 #Lead contact

15 \*Correspondance :

16 Matthew Ng: matthew.ng@medisin.uio.no

17 Anne Simonsen: anne.simonsen@medisin.uio.no

18

19 §Current affiliation: AstraZeneca plc.

20

21

22

23 **Keywords: cholesterol, autophagy, GRAM, MBCD, ccRCC**

24

25

26

27

28

29

30 **Abstract**

31 During autophagy, cytosolic cargo is sequestered into double-membrane vesicles called  
32 autophagosomes. The origin and identity of the membranes that form the autophagosome  
33 remain to be fully characterized. Here, we investigated the role of cholesterol in starvation-  
34 induced autophagy and identify a role for the ER-localized cholesterol transport protein  
35 GRAMD1C in the regulation of autophagy and mitochondrial function. We demonstrate that  
36 cholesterol depletion leads to a rapid induction of autophagy, possibly caused by a corresponding  
37 increased abundance of curved autophagy membranes. We further show that GRAMD1C is a  
38 negative regulator of starvation-induced autophagy. Similar to its yeast orthologue, GRAMD1C is  
39 recruited to mitochondria through its GRAM domain. Additionally, we find that GRAMD1C  
40 depletion leads to increased mitochondrial cholesterol accumulation and mitochondrial oxidative  
41 phosphorylation. Finally, we demonstrate that expression of GRAM family genes is linked to clear  
42 cell renal carcinoma survival, highlighting the pathophysiological relevance of cholesterol  
43 transport proteins.

44

45

46 **Abbreviations:**

47 ATV (Atorvastatin)

48 BafA1 (Bafilomycin A1)

49 CCCP (Carbonyl cyanide m-chlorophenyl hydrazone)

50 DFP (Deferiprone)

51 ER (Endoplasmic Reticulum)

52 GKO (GRAMD1C Knockout)

53 MBCD (Methyl- $\beta$ -Cyclodextrin)

54 PM (Plasma Membrane)

55 Wt (Wild-type)

56 ccRCC (Clear Cell Renal Carcinoma)

57

## 58 **Introduction**

59 Macroautophagy (referred henceforth as autophagy) involves the *de novo* formation of  
60 membranes that sequester cytoplasmic cargo into double-membrane autophagosomes, which  
61 subsequently fuse with lysosomes, leading to cargo degradation and recycling of the resulting  
62 macromolecules to obtain homeostasis during periods of starvation and cellular stress.  
63 Autophagosome biogenesis is initiated through the recruitment of the ULK1 kinase complex  
64 (including ULK1, ATG101, ATG13, FIP200) and the class III phosphatidylinositol 3-kinase complex  
65 1 (PIK3C3-C1, consisting of BECN1, ATG14L1, PIK3C3, PIK3R4) to endoplasmic reticulum (ER)  
66 associated sites, from where newly formed autophagosomes emanate. The autophagosome  
67 membrane is largely devoid of transmembrane proteins<sup>1</sup> and its formation is therefore thought  
68 to be regulated by membrane associated proteins, as well as its lipid composition and lipid  
69 distribution<sup>2</sup>. Previous studies have shown that autophagosomes are enriched in unsaturated  
70 fatty acids<sup>3</sup> and that these are necessary for autophagosome formation<sup>4,5</sup>. These observations  
71 suggest that decreased membrane order is favorable towards autophagy initiation, possibly by  
72 generating flexible, highly curved membranes known to be required for autophagosome  
73 formation<sup>6</sup>. In addition to phospholipids, cholesterol is a crucial component of mammalian  
74 membranes and its abundance is also a determinant of membrane order and fluidity<sup>7,8</sup>. It is  
75 noteworthy that freeze fracture electron microscopy analysis revealed early autophagosomal  
76 structures to be cholesterol poor<sup>9</sup>, suggesting that cholesterol poor membranes are the principal  
77 source of membranes during autophagosome biogenesis. In agreement with this, cholesterol  
78 depletion with methyl- $\beta$  cyclodextrin (MBCD) and statins have been reported to promote LC3  
79 lipidation and its turnover<sup>10-15</sup>. A few studies have however found that high cholesterol levels  
80 promote autophagy<sup>16,17</sup>. The majority of these studies involved long-term cholesterol  
81 manipulation that can lead to metabolic rewiring, and changes in transcriptional and signaling  
82 pathways<sup>18</sup> and might therefore not reflect the direct influence of cholesterol in autophagy.

83 Intracellular cholesterol levels are maintained through a combination of new synthesis and  
84 extracellular cholesterol uptake. In addition to the low-density lipoprotein receptor (LDLR)  
85 pathway, several cholesterol transport proteins have been shown to mediate import and  
86 intracellular cholesterol transport directly from the plasma membrane (PM)<sup>19,20</sup>. An example of

87 such cholesterol transport proteins is the GRAM family (consisting of GRAMD1A, GRAMD1B,  
88 GRAMD1C, GRAMD2 and GRAMD3, also known as Aster Proteins), named after the PH-like GRAM  
89 domain in their N-terminal region. Among the five members, only GRAMD1A, GRAMD1B and  
90 GRAMD1C (herein collectively referred to as GRAMD1s) contain a sterol binding VAS<sub>t</sub> domain,  
91 allowing them to facilitate PM to ER cholesterol import<sup>21-23</sup>. Loss of GRAMD1s lead to  
92 accumulation of cholesterol on the plasma membrane<sup>21</sup>, and mouse macrophages lacking  
93 GRAMD1A and GRAMD1B displayed increased cholesterol accumulation in the PM and  
94 upregulated expression of SREBP2 target genes, indicative of decreased ER cholesterol<sup>23</sup>. Due to  
95 a limited number of studies on the GRAM family proteins, their biological importance is still not  
96 fully understood. A recent study reported that GRAMD1A activity is required for autophagy  
97 initiation<sup>24</sup>, suggesting that cholesterol transport proteins can facilitate autophagy through  
98 regulation of cholesterol movement. GRAM family proteins were shown to form  
99 heterocomplexes in a manner that is dependent on their C-terminal amphipathic helix region<sup>21</sup>,  
100 indicating that other GRAM proteins may also regulate autophagy.

101 Here, we show that cholesterol and the ER-anchored cholesterol transport protein GRAMD1C  
102 negatively regulates autophagy initiation. We show that GRAMD1C associates with mitochondria  
103 through its GRAM domain and that its depletion leads to accumulation of mitochondrial  
104 cholesterol and increased mitochondrial respiration. Finally, we show that members of the GRAM  
105 family of cholesterol transport proteins are involved in clear cell renal carcinoma (ccRCC) survival.  
106 The GRAMs therefore represent potential regulators of the autophagy pathway and ccRCC.

107

## 108 **Results**

### 109 **Cholesterol depletion promotes autophagy initiation.**

110 Previous *in vivo* and *in vitro* studies have indicated that cholesterol depletion promotes  
111 autophagy<sup>13,25-27</sup>, but most of these studies involve cells being depleted of cholesterol for  
112 extended time periods where changes in autophagy can be caused by metabolic and  
113 transcriptional responses, thus indirectly activating autophagy. To investigate a more direct role  
114 of cholesterol on membrane remodeling during autophagy, we analyzed the short-term effects

115 on starvation-induced autophagy after cholesterol depletion using MBCD, which rapidly removes  
116 cholesterol from cellular membranes<sup>28</sup>. U2OS cells were treated with MBCD for 1 hr in control  
117 (DMEM) or starvation (EBSS) medium in the presence or absence of the lysosomal V-ATPase  
118 inhibitor Bafilomycin A1 (BafA1), followed by immunoblotting for the autophagosome marker  
119 LC3B and p62, to determine autophagic flux. Cholesterol depletion caused a 3-fold increase in  
120 LC3B lipidation (LC3B-II) under basal conditions, compared to control cells, which was further  
121 enhanced in starved cells depleted of cholesterol (Figure 1a-b). In line with this, cholesterol  
122 depletion increased the formation of endogenous LC3B puncta both in fed and starved cells, as  
123 analyzed by immunofluorescence microscopy (Figure 1c-d). In both cases, the starvation-induced  
124 autophagic flux was higher in MBCD treated cells, suggesting that cholesterol and amino acid  
125 depletion can modulate autophagy synergistically. Similarly, long-term cholesterol depletion  
126 using atorvastatin (ATV) for 48 hrs, an HMG-CoA reductase inhibitor, caused a similar increase in  
127 starvation-induced autophagy (Figure 1e-f), while p62 turnover was not significantly altered with  
128 MBCD or ATV treatment (Supplementary figure 1a-b).

129 Autophagosome biogenesis is regulated by the autophagy initiation machinery comprising the  
130 ULK1 complex (ATG13, ULK1, FIP200, ATG101), PI3CK3 complex (ATG14L, BECN1, PIK3C3, P150)  
131 and the ATG12-ATG5-ATG16L1 complex. Given that LC3B lipidation was further increased in cells  
132 co-treated with MBCD and BafA1 compared to MBCD treated cells (Figure 1a-f), we suspected  
133 that the increase in LC3B lipidation was caused by changes in autophagosome biogenesis. In line  
134 with this, we observed a significant increase in the number of puncta positive for the early  
135 autophagy markers ATG13 and ATG16L1 in U2OS cells treated with MBCD for 1 hr, which was  
136 further increased upon amino acid starvation (Figure 1g-i). In support of this, ATV treated cells  
137 also exhibited enhanced ATG13 recruitment at both basal and starved states (Figure 1j-k). Taken  
138 together, these results show that cholesterol depletion promotes autophagy induction and  
139 enhances starvation-induced autophagy.

#### 140 **Cholesterol depletion facilitates starvation-induced autophagy in an mTORC1 independent** 141 **manner**

142 Recent reports indicate that mTORC1 signaling is regulated by lysosomal cholesterol levels, and  
143 that lysosomal cholesterol depletion leads to the inactivation of mTORC1<sup>29,30</sup>. Since we observed

144 a synergistic effect on autophagy flux of cholesterol and amino acid starvation, we suspected that  
145 cholesterol depletion induces autophagy, in part, through a pathway that is independent of  
146 mTORC1 inactivation. To study this, we investigated the short-term temporal dynamics of  
147 mTORC1 signaling and autophagic flux in U2OS cells treated or not with either MBCD or ATV and  
148 starved at different time points (15, 30, 45 or 60 min) prior to immunoblotting for LC3B and the  
149 mTORC1 substrate p70S6K. Surprisingly, starvation-induced LC3B flux was significantly increased  
150 at 30 min in starved cells treated with MBCD, while this required 45 min in starved control cells  
151 (Figure 2a-b), indicating a more rapid induction of autophagosome biogenesis in cholesterol-  
152 depleted cells. This observation was recapitulated in ATV treated cells (Figure 2c-d). Interestingly,  
153 while the mTORC1 specific phosphorylation of p70S6K was completely lost after 15 mins of amino  
154 acid starvation, it took more than 30 mins in cells treated with MBCD (Figure 2e), indicating a  
155 delayed kinetic of mTORC1 inactivation in cells subjected to cholesterol depletion compared to  
156 that seen in starved cells. mTORC1 inactivation results in activation of the ULK1 complex<sup>31</sup>.  
157 Intriguingly, we found that ATG13 positive structures formed already after 15 min of MBCD  
158 treatment (Figure 2f-g), before the complete inactivation of mTORC1 (Figure 2e) suggesting that  
159 cholesterol depletion induces autophagy independent of mTORC1 signaling.

160 As cholesterol is often found between the carbon chains of membrane phospholipids, we  
161 hypothesized that cholesterol removal promotes generation of curved membranes during *de*  
162 *novo* synthesis of autophagic membranes. To study this, we generated a membrane curvature  
163 reporter based on the amphipathic helix of the BATS domain of ATG14L1, known to bind to  
164 curved PtdIns(3)P-enriched membranes destined for autophagosome formation<sup>32</sup>  
165 (Supplementary figure 1c). U2OS cells stably expressing EGFP-BATS formed puncta when starved  
166 for 1 hr (Figure 2h), where most puncta co-localized with autophagy initiation proteins (ATG13,  
167 ATG16L1, and WIPI2), as well as LC3B positive structures (Supplementary figure 1d), indicating  
168 that it marks early autophagy membranes. As predicted, MBCD treatment caused a significant  
169 increase of EGFP-BATS puncta compared to control cells (Figure 2h), indicating that cholesterol  
170 depletion induces the formation of curved early autophagy membranes.

171 **GRAMD1C is a negative regulator of starvation-induced autophagy.**

172 To elucidate whether genetic manipulation of cellular cholesterol levels also affects autophagy,  
173 we decided to deplete cholesterol transport proteins that are mediators of non-vesicular inter-  
174 organellar cholesterol movement at membrane contact sites<sup>20</sup>. The GRAM family of proteins,  
175 GRAMD1A, GRAMD1B, GRAMD1C, GRAMD2 and GRAMD3 (encoded by *GRAMD1A*, *GRAMD1B*,  
176 *GRAMD1C*, *GRAMD2a* and *GRAMD2b*) are ER anchored transmembrane proteins<sup>22</sup> that function  
177 as cholesterol transport proteins, known to mediate plasma membrane to ER cholesterol  
178 transport<sup>21</sup>. Given that the GRAMs form a complex through their C-terminal region<sup>21</sup> and since  
179 GRAMD1A has been implicated in autophagy<sup>24</sup>, we asked whether the other members of the  
180 GRAM family also have a role in autophagy. To study this, U2OS cells with stable inducible  
181 expression of the autophagy reporter mCherry-EGFP-LC3B (yellow-autophagosome, red-  
182 autolysosome due to quenching of EGFP in the acidic lysosome) were transfected with siRNA to  
183 individually deplete each GRAM family member, followed by quantification of the number of red-  
184 only puncta in starved and non-starved cells in the absence or presence of BafA1. Interestingly,  
185 there was a significant increase in the number of red-only puncta in GRAMD1C depleted cells  
186 compared to control, indicating that GRAMD1C is a negative regulator of starvation-induced  
187 autophagic flux (Figure 3a-b). Addition of BafA1 abolished the formation of red-only structures  
188 in both control and starved condition, confirming that these structures represent autolysosomes.  
189 In contrast to previous reports, GRAMD1A depletion did not inhibit starvation-induced  
190 autophagy, but rather promoted basal autophagy flux. The role for GRAMD1C in regulation of  
191 starvation-induced autophagy was validated by LC3B immunoblotting in cells depleted of  
192 GRAMD1C with two different siRNA oligos (Supplementary figure 2a). Indeed, the starvation-  
193 induced turnover of LC3B-II was significantly elevated in GRAMD1C knockdown cells, supporting  
194 a role for GRAMD1C as a negative regulator of autophagy (Figure 3c-d). We did not observe a  
195 significant change of p62 turnover upon GRAMD1C depletion (Supplementary figure 2b). Since  
196 lipidated LC3B and p62 do not fully represent the cargo diversity of the autophagosome and as  
197 LC3B is also implicated in non-canonical autophagy, we investigated the turnover of long-lived  
198 proteins, which are predominantly degraded through autophagy<sup>33</sup> (Figure 3e). Indeed, the  
199 turnover of radioactively labelled long-lived proteins was increased in GRAMD1C depleted cells

200 (Figure 3f), further demonstrating a role for GRAMD1C as a negative regulator of starvation-  
201 induced autophagy.

202 To investigate whether GRAMD1C or any of the other GRAM family members regulate selective  
203 autophagy, U2OS cells with stable inducible expression of a mitophagy reporter construct  
204 (Mitochondria localization signal (MLS)-mCherry-EGFP) and stable ectopic Parkin expression  
205 were transfected with siRNA targeting each GRAM family protein, followed by induction of  
206 mitophagy by deferiprone (DFP) or CCCP. DFP is an iron chelator that induces a HIF1 $\alpha$ -dependent  
207 response, leading to induction of Parkin-independent mitophagy<sup>34</sup>, while CCCP treatment results  
208 in loss of mitochondrial membrane potential and induction of Parkin-dependent mitophagy<sup>35</sup>.  
209 Cells were subjected to high content microscopy and quantification of red-only puncta, as a read-  
210 out for mitophagy. Knockdown of GRAMD1C neither affected Parkin-dependent (Supplementary  
211 figure 3a-b) nor Parkin-independent mitophagy (Supplementary figure 3c-d). Interestingly,  
212 GRAMD1A depletion increased DFP-induced mitophagy (Supplementary figure 3c-d). Taken  
213 together, our data suggest that GRAMD1C is a negative regulator of starvation-induced  
214 autophagy that is dispensable for selective clearance of mitochondria.

### 215 **GRAMD1C regulates autophagy initiation**

216 As we found cholesterol depletion to increase autophagy initiation, we investigated if depletion  
217 of GRAMD1C caused a similar phenotype. Indeed, GRAMD1C depletion in U2OS cells resulted in  
218 increased membrane recruitment of several early autophagy machinery components, such as the  
219 ULK1 complex subunit ATG13, the ATG16L1-ATG5-ATG12 complex and the PtdIns(3)P effector  
220 protein WIPI2b<sup>36</sup>, as analyzed by quantification of the respective puncta from control and starved  
221 cells (Figure 4a-d). To corroborate these findings, we generated GRAMD1C knockout (GKO) cells  
222 (Supplementary figure 2c), and found a significant increase in ATG13 and ATG16L1 puncta  
223 formation in the GKO cells compared to passage matched wild type (Wt) cells, both before and  
224 after amino acid starvation (Figure 4e-g). Given that cholesterol depletion promoted the  
225 formation of BATS domain structures, we depleted GRAMD1C in cells expressing EGFP-BATS.  
226 Notably, GRAMD1C depletion promoted the recruitment of EGFP-BATS in starved cells (Figure  
227 4h-i). Interestingly, we found GRAMD1C itself to also be delivered to the lysosomes upon  
228 starvation, as red-only puncta were seen in starved cells expressing mCherry-EGFP-GRAMD1C,



229 which were sensitive to BafA1 (Supplementary figure 2d). Taken together, these results indicate  
230 that GRAMD1C regulates autophagosome biogenesis by removal of cholesterol from ER  
231 membranes, leading to recruitment of early autophagic markers.

### 232 **The GRAM domain of GRAMD1C mediates its interaction to the mitochondria**

233 The yeast orthologue of the GRAMs, Lam6, is promiscuously enriched at different organellar  
234 contact sites, such as the vCLAMP (vacuole and mitochondria patch), NVJ (nuclear vacuolar  
235 junction) and ERMES (ER-mitochondria encounter structures)<sup>37</sup>. In contrast, GRAMD1C has only  
236 been reported to be recruited to the plasma membrane to facilitate cholesterol import<sup>22,38</sup>. The  
237 lipid-binding GRAM domain is thought to be responsible for protein targeting to a specific  
238 organelle and given the relative conservation of the GRAM domain of GRAMD1C to that of Lam6  
239 (37.88% sequence identity) (Supplementary figure 4a), we asked whether GRAMD1C also  
240 exhibited other contact site localizations. Stable cell lines expressing EGFP-tagged wild type  
241 GRAMD1C or the GRAM domain only (Figure 5a) were analyzed by live cell microscopy. As  
242 expected, GRAMD1C-EGFP localized to the ER, but was also found to be enriched at regions of  
243 ER/mitochondria overlap (Figure 5b). Interestingly, the EGFP-GRAM domain localized to  
244 structures that appeared to associate onto mitochondria for a few seconds before dissociating,  
245 suggesting that the GRAM domain of GRAMD1C facilitates a transient interaction with  
246 mitochondria (Figure 5c). Indeed, the mitochondrial interaction of the GRAM domain was  
247 validated by isolation and immunoblotting of mitochondria from cells expressing the EGFP-GRAM  
248 domain, showing the EGFP-GRAM domain both in the crude and pure mitochondria fractions  
249 (Figure 5d). In an attempt to identify proteins interacting specifically with the GRAM domain of  
250 GRAMD1C, and by extension characterize the interactome of GRAMD1C, we carried out co-  
251 immunopurification coupled mass-spectrometry (coIP-MS) analysis of the interactome of EGFP  
252 tagged GRAMD1C and GRAMD1C lacking the GRAM domain ( $\Delta$ GRAM). As expected, GRAMD1A,  
253 GRAMD1B, GRAMD2 and GRAMD3 were amongst the interactome of GRAMD1C (Figure 5e, Table  
254 I). Strikingly, GO-term enrichment revealed that GRAMD1C mainly interacted with proteins of  
255 mitochondrial origin (Figure 5f, Table I). Additionally, several mitochondrial proteins such as  
256 NDUFAF2, SHDB and ATAD3A, as well as ER-mitochondria contact site proteins, VDAC1 and ACSL4  
257 were enriched in the interactome of GRAMD1C, but absent in that of  $\Delta$ GRAM (Figure 5g),

258 indicating that the mitochondrial interaction of GRAMD1C is dependent on the GRAM domain.  
259 As the interaction between mitochondria and ER can be affected by changes in mitochondrial  
260 structure, we analyzed mitochondrial morphology upon the depletion of the GRAMs, but did not  
261 see any changes to mitochondrial morphology upon depletion of GRAMD1C (Supplementary  
262 figure 4b-c). Thus, our results show that GRAMD1C interacts with the mitochondria through its  
263 GRAM domain.

#### 264 **GRAMD1C regulates mitochondrial bioenergetics**

265 Given the ability of GRAMD1C to interact with mitochondria, we next asked if GRAMD1C can  
266 potentially regulate cholesterol movement between the ER and the mitochondria. For that  
267 reason, we developed a method for mitochondrial cholesterol quantification based on the  
268 addition of recombinant mCherry-tagged cholesterol binding domain of Perfringolysin O  
269 (mCherry-D4)<sup>39</sup> to isolated mitochondria. As expected, MBCD treatment decreased mCherry-D4  
270 binding to purified mitochondria, indicating that mCherry-D4 selectively binds to cholesterol on  
271 isolated mitochondria (Figure 6a-b). Importantly, increased levels of mCherry-D4 were detected  
272 on the mitochondria isolated from GRAMD1C KO cells compared to control cells (Figure 6a-b),  
273 indicating that GRAMD1C regulates mitochondrial cholesterol levels. In support of this,  
274 cholesterol oxidase-based quantification of mitochondrial cholesterol revealed a similar increase  
275 of mitochondrial cholesterol in GRAMD1C KO cells compared to control cells (Figure 6c). At the  
276 same time, loss of GRAMD1C caused a reduction of ER cholesterol levels, as seen through an  
277 increase in SREBP target gene expression (Supplementary figure 4d), in line with a previous  
278 observations<sup>40</sup>. Additionally, the abundance of cholesterol-associated proteins (STARD9, ERLIN,  
279 SQLE, NPC2, and APOB) in GRAMD1C depleted cells were altered as seen through proteomic  
280 analysis of siGRAMD1C treated cells (Supplementary figure 4e, Table II). Thus, our data indicate  
281 that GRAMD1C facilitates cholesterol transport from mitochondria to the ER.

282 In order to investigate the implication of this increased mitochondrial cholesterol level, we  
283 inspected mitochondrial function in GRAMD1C depleted cells. Interestingly, GRAMD1C depletion  
284 increased the ATP-production linked respiration and the maximal respiratory capacity as  
285 analyzed by Seahorse XF Analyzer (Figure 6d-e). Furthermore, western blot analysis did not reveal  
286 significant changes to the OXPHOS proteins in GRAMD1C knockdown cells (Figure 6f-g),

287 suggesting that the change in mitochondrial respiration was not caused by changes in the  
288 mitochondrial proteome. Similarly, mitochondrial membrane potential and total cellular reactive  
289 oxygen species (ROS) were not altered in GRAMD1C knockdown cells (Supplementary figure 4f-  
290 g). In summary, our results indicate that GRAMD1C is a negative regulator of mitochondrial  
291 cholesterol abundance and mitochondrial bioenergetics.

### 292 **GRAM family expression is prognostic in ccRCC**

293 GRAM proteins have previously been implicated in tumorigenesis, as GRAMD1B depletion was  
294 found to promote breast cancer cell migration<sup>41</sup>, while *GRAMD1C* transcript levels seems to  
295 positively correlate with the level of immune cell infiltration and overall survival in Clear Cell  
296 Renal Carcinoma (ccRCC) patients<sup>42</sup>. ccRCC is a type of kidney cancer that stems from the  
297 epithelial cells of the proximal convoluted tubule of the kidney<sup>43</sup>, and is characterized by altered  
298 mitochondrial metabolism and aberrant lipid and cholesterol accumulation<sup>44</sup>. Given that  
299 *GRAMD1C* expression correlates with overall survival in ccRCC<sup>42</sup> and forms a heteromeric  
300 complex with the other GRAMS<sup>21</sup>, we investigated the involvement of the complete GRAM family  
301 in ccRCC using tumor gene expression data from the TCGA KIRC cohort<sup>45</sup>. Interestingly, the  
302 expression of several GRAM family members was significantly associated with survival outcome.  
303 Similar to *GRAMD1C*, high *GRAMD2B* expression was associated with improved patient survival  
304 in ccRCC. By contrast, low expression of GRAMD1A and GRAMD1B was favorable with respect to  
305 survival (Figure 7a). We further found a weak negative correlation between *GRAMD1C* expression  
306 and *GRAMD1A* and *GRAMD1B* levels (Supplementary figure 5a), reflecting their differential  
307 influence on overall survival. Furthermore, while *GRAMD1C* expression was decreased in  
308 advanced stage tumors, the expression of *GRAMD1A* and *GRAMD1B* showed an opposite pattern,  
309 with increased expression in late stage tumor samples compared to early stage tumor samples  
310 (Supplementary figure 5b).

311 We were able to validate this observation using a colony formation assay in 786-O ccRCC cells  
312 transfected with siRNA against all GRAMs, showing that depletion of *GRAMD1A* and *GRAMD1B*  
313 significantly decreased the ability of 786-O cells to form colonies (Figure 7b-c), supporting the  
314 role of these genes in ccRCC survival. As overall survival is also affected by invasive and migration  
315 capabilities of the tumor, we analyzed migration of 786-O cells depleted of GRAMD1A-C using a

316 wound healing assay. However, only the migration of siGRAMD1B treated cells was slightly  
317 decreased (Supplementary figure 6a-b). Similar to our observation in U2OS cells, *GRAMD1C*  
318 depletion promoted ATP-production linked respiration in ccRCC 786-O cells (Figure 7d), indicating  
319 that the relationship between mitochondrial bioenergetics and GRAMD1C is conserved among  
320 cell lines.

321 In order to better understand the role of GRAMD1C in ccRCC, we analyzed the genes co-  
322 expressed with *GRAMD1C*, as co-expressed gene networks can allow identification of functionally  
323 related genes<sup>46</sup>. Interestingly, *GRAMD1C* is co-expressed with several mitochondrial genes in  
324 ccRCC samples, including AUH, AK3, MICU2 and SIRT5, which all moderately correlated with  
325 GRAMD1C with Pearson's correlations values of above 0.45 (Figure 7e-f). In conclusion, members  
326 of the GRAM family contribute to the regulation of overall survival of ccRCC patients, possibly  
327 through modulation of metabolism and cancer cell survival.

## 328 **Discussion**

329 In this study, we investigated the effects of cholesterol and the cholesterol transport protein,  
330 GRAMD1C on starvation-induced autophagy. We show that cholesterol depletion promotes  
331 autophagy initiation and enhances starvation-induced autophagy flux independently of mTOR  
332 signaling. Additionally, we show that depletion of GRAMD1C promotes starvation-induced  
333 autophagy. Importantly, we find GRAMD1C to interact with mitochondria through its PH-like  
334 GRAM domain but has no effect on Parkin-dependent or -independent mitophagy. Depletion of  
335 GRAMD1C leads to increased mitochondrial cholesterol abundance and increased mitochondrial  
336 bioenergetics. Finally, we identify the GRAM family as genes involved in ccRCC survival,  
337 highlighting the pathophysiological relevance of cholesterol transport proteins.

338 Autophagosomes are small vesicles (approx. 0.5-1  $\mu$ m) formed *de novo* from ER-associated sites  
339 <sup>47</sup>. In order to facilitate the generation of the autophagosome, forming membranes will require  
340 a high degree of curvature and flexibility, which must be partially supported by specialized lipid  
341 compositions. Reflecting this, localized fatty acid synthesis has been shown to occur at autophagy  
342 biogenesis sites and are required for autophagosome generation<sup>48-50</sup>. Furthermore, the  
343 autophagy proteins ATG2 and ATG9 have been shown to facilitate lipid delivery to growing

344 autophagosomes<sup>51-53</sup>. The role of cholesterol during autophagosome biogenesis remains to be  
345 clarified, but given that membrane cholesterol increases membrane rigidity, it is likely that high  
346 cholesterol abundance at autophagosome initiation sites is unfavorable for autophagosome  
347 biogenesis.

348 Interestingly, cholesterol depletion has a synergistic effect on autophagic flux in response to  
349 amino acid starvation, suggesting that cholesterol and amino acid depletion activate autophagy  
350 in part through mutually exclusive mechanisms. Indeed, our data suggest that the short-term  
351 effect of cholesterol depletion on autophagy induction is independent of mTORC1 inactivation  
352 and rather is mediated by a change in the membrane curvature, as membrane recruitment of the  
353 curvature-sensing BATS domain of ATG14L was significantly increased in cells depleted of  
354 cholesterol. As ATG14L is recruited to PtdIns(3)P enriched ER-associated omegasomes upon  
355 induction of autophagy by starvation<sup>54</sup>, we speculated that a removal of cholesterol at such sites  
356 might facilitate autophagosome biogenesis.

357 The proteins of the GRAM family are ER anchored transmembrane proteins that function as  
358 cholesterol transport proteins<sup>21</sup> that previously have been shown to be recruited to the PM in  
359 order to facilitate ER cholesterol import<sup>22</sup>. We demonstrate here that GRAMD1C depletion  
360 promotes starvation-induced autophagy by increasing the numbers of autophagosome initiation  
361 sites. Most interestingly, mitochondrial cholesterol levels were increased in GRAMD1C depleted  
362 cells, suggesting that it regulates cholesterol transport between mitochondria and the ER.  
363 Supplementing these findings, we show that GRAMD1C interacts with the mitochondria through  
364 its GRAM domain and co-precipitates with mitochondrial proteins. Interestingly, instead of its  
365 GRAM domain, the interaction of GRAMD1B to the mitochondria was reported to be dependent  
366 on a mitochondrion targeting sequence located upstream of its GRAM domain<sup>55</sup>, indicating that  
367 the GRAMs may be differently recruited to target organelles. It remains to be shown whether  
368 GRAMD1C interacts directly with any mitochondrial proteins or whether mitochondria fragments  
369 were indirectly pulled down with GRAMD1C. Interestingly, GRAMD1C copurified with ACSL4 and  
370 VDAC1, both markers of ER-mitochondria contact sites, supporting the localization of GRAMD1C  
371 to these regions. We were not able to establish if GRAMD1C is a *bona fide* contact tether<sup>56</sup>, or if  
372 this interaction is transient in nature. Autophagy initiation occurs at ER-mitochondria contact

373 sites<sup>57,58</sup>, thus placing GRAMD1C at sites of autophagosome biogenesis and we propose a model  
374 where GRAMD1C functions as a negative regulator of autophagy by regulating cholesterol levels  
375 at autophagosome initiations sites (Supplementary figure 6c).

376 Recent reports suggest the involvement of GRAMD1A in the regulation of autophagosome  
377 biogenesis. Surprisingly, GRAMD1A depletion in U2OS cells did not inhibit autophagy as  
378 previously reported in MCF7 and HEK293T cells<sup>24</sup>, but rather enhanced basal autophagy flux.  
379 While it was recently suggested that GRAMD1C negatively regulates autophagy in immortalized  
380 mouse myoblast C2C12 cells, this statement was not supported with autophagy flux  
381 experiments<sup>59</sup>. Nevertheless, these observed differences could stem from the divergence in the  
382 cholesterol requirement between cell types. The effects of GRAMD1C depletion on autophagy  
383 were not as drastic as compared to MBCD-mediated cholesterol depletion, leading us to suspect  
384 that GRAMD1A and GRAMD1B were able to partially compensate for the loss of GRAMD1C given  
385 their highly similar structures. However, GRAMD1C KO (GKO) cells exhibited a more pronounced  
386 induction of autophagy initiation events, suggesting that GRAMD1C is not completely redundant  
387 in the long-term. Furthermore, GRAMD1C did neither alter Parkin-dependent nor -independent  
388 mitophagy, possibly reflecting a difference in the *de novo* formation of the autophagosome  
389 during selective and non-selective autophagy.

390 The increased mitochondrial cholesterol levels seen in GRAMD1C depleted cells is reminiscent of  
391 the increase in mitochondrial cholesterol in Niemann Pick C1 (NPC1) depleted cells<sup>60</sup>. However,  
392 the relationship between mitochondrial cholesterol and respiration is not clear. Previous studies  
393 have found that mice fed with a cholesterol-enriched diet displayed increased mitochondrial  
394 cholesterol and decreased mitochondrial respiration<sup>61</sup>, but cholesterol removal with MBCD<sup>62</sup> and  
395 simvastatin also decreased mitochondrial respiration<sup>63</sup>. This discrepancy can possibly be  
396 attributed to the different experimental models and cholesterol loading/depletion systems used.  
397 Our results suggest that mitochondrial cholesterol accumulation caused by the loss of GRAMD1C  
398 promotes oxidative phosphorylation. While we have not been able to establish a mechanism for  
399 this, proteomic analysis of GRAMD1C depleted cells suggest an altered composition of proteins  
400 involved in cellular metabolism. Moreover, the abundance of Glycogen Synthase Kinase 3 beta  
401 (GSK3B), Glycogenin-1 (GYG1) and Glycerol-3-phosphate phosphatase (PGP), proteins involved in

402 glycogen synthesis, were decreased in GRAMD1C depleted cells. In contrast the glycolysis  
403 regulator 6-phosphofructo-2-kinase/Fructose-2,6-bisphosphatase 4 (PFKFB4) was increased in  
404 cells treated with siGRAMD1C (Supplementary figure 4e). The significance of these changes is not  
405 clear, but it suggests that metabolic rewiring accompanies the loss of GRAMD1C.

406 ccRCC cells exhibit a disrupted cholesterol homeostasis, accumulating up to 8 times more higher  
407 cholesterol compared to normal kidney cells<sup>64,65</sup>. However this increase does not appear to stem  
408 from increased cholesterol synthesis and possibly originates from aberrant cholesterol transport  
409 and metabolism<sup>64</sup>. It is therefore interesting that high expression of GRAMD1C and GRAMD2B  
410 was found to associate with improved survival of ccRCC patients, while the opposite was found  
411 for GRAMD1A and GRAMD1B. This suggests that the GRAMs may have opposing roles in ccRCC  
412 carcinogenesis and survival despite their domain similarities. Critically, mirroring the observation  
413 on overall survival, we found that depletion of *GRAMD1A* and *GRAMD1B* in 786-O ccRCC cells  
414 caused a significant decrease in cell survival, suggesting that the GRAMS are relevant therapeutic  
415 targets for ccRCC.

416 In conclusion, our results show that short-term cholesterol depletion is favorable for  
417 autophagosome biogenesis by increasing the membrane recruitment of early core autophagy  
418 proteins. We show that depletion of the ER-anchored cholesterol transport protein GRAMD1C  
419 promotes starvation-induced autophagy and find GRAMD1C to interact with mitochondria to  
420 facilitate mitochondria-ER cholesterol transport. Finally, we find that the expression of various  
421 *GRAM* genes correlates with ccRCC survival. These results underline the importance of  
422 cholesterol transport proteins in autophagy and mitochondrial bioenergetics and warrants  
423 further investigation into the regulation of membrane cholesterol during autophagosome  
424 biogenesis and cancer.

425

426

427

## 428 **Materials and Methods**

### 429 **Antibodies**

430 The following primary antibodies were used: anti-LC3B (Western blotting, #3868, Cell Signaling),  
431 anti-LC3B (Immuno-fluorescence microscopy, #PM036, MBL), anti-p62 (#610833, BD  
432 biosciences), anti-tubulin (#T5168, Sigma), anti-actin (#3700, Cell Signaling), anti-EGFP (#632381,  
433 Takara), anti-mCherry (#PA534974, Thermo Fisher), anti-TOM20 (#17764, Santa Cruz), anti-  
434 TIM23 (#611223, BD Biosciences), anti-COX IV (#4850, Cell Signaling), anti-ATG13 (#13468, Cell  
435 Signaling), anti-ATG16L1 (#PM040, MBL), anti-WIP1 (#Ab105459, Abcam) anti-VDAC1  
436 (#ab15895, Abcam total OXPHOS antibody (#ab110413, Abcam), anti-PDH (#27845, Cell  
437 Signaling), GAPDH (#5174, Cell Signaling), p70S6K (#9202, Cell Signaling), phospho-P70S6K  
438 (Thr389) (#9205, Cell Signaling).

439 Secondary antibodies for western blotting used were anti-mouse DyLight 680 (#SA5-10170,  
440 Thermo Fisher), anti-rabbit DyLight 800 (#SA5-10044, Thermo Fisher). Secondary antibodies used  
441 for immunofluorescence were Anti-rabbit Alexa Fluor 488 (#A-21206, Invitrogen) and Anti-mouse  
442 CY3 (#115-165-146, Jackson).

#### 443 Materials

444 The following chemicals were used: Bafilomycin A1 (#BML-CM110, Enzo Life Sciences), CCCP  
445 (#BML-CM124, Enzo Life Sciences) Oligomycin A (#S1478, Selleckchem). Antimycin A (#A8674,  
446 Sigma Aldrich), DFP (#37940, Sigma Aldrich), DTT (#441496p, VWR), Rotenone (#R8875, Sigma  
447 Aldrich), MBCD (#M7439, Sigma Aldrich). For lysis buffers, Complete EDTA-free protease inhibitor  
448 (#05056489001, Roche) and PhosStop phosphatase inhibitor (#04906837001, Roche) were used.  
449 For live cell imaging, Mitotracker Red (#M22425, Thermo Fisher) was used. For measurement of  
450 ROS, CellRox (#C10422, Thermo Fisher) was used. To measure mitochondrial membrane  
451 potential, cells were incubated in TMRE (#T669, Thermo Fisher). For amino acid starvation, cells  
452 were cultured in Earle's Balanced Salt Solution (EBSS) (Invitrogen). Percoll (#sc-500790A, Santa  
453 Cruz). For high-throughput widefield microscopy, cells were cultured in  $\mu$ -Plate 96 Well ibiTreat  
454 (#89626, Ibidi).

455 Silencer Select siRNA (Thermo Fisher) were used against the following target genes. GRAMD1A  
456 (s33529), GRAMD1B (s33113), GRAMD1C (s29400 siGRAMD1C-1, s29401 siGRAMD1C-2),



457 GRAMD2a (s47069), GRAMD2b (s35302), OPA1 (s9851), DRP1 (s19559) and Negative Control  
458 (s813).

#### 459 Cell lines

460 U2OS, U2OS Flp-In and HEK293T were cultured in complete DMEM containing 10 % v/v fetal  
461 bovine serum and 100 U/mL Penicillin + 100 µg/mL Streptomycin at 37°C in 5% CO<sub>2</sub>. 786-O cells  
462 were grown in RPMI supplemented with containing 10 % v/v fetal bovine serum and 100 U/mL  
463 Penicillin + 100 µg/mL Streptomycin at 37°C in 5% CO<sub>2</sub>. U2OS TRex FlpIn cells (kindly provided by  
464 Steve Blacklow, Harvard Medical School, US) were used for generation of stable inducible cell  
465 lines.

#### 466 Lentivirus production and stable cell line generation

467 Stable cells were generated using lentiviral transduction and Flp-In Trex system<sup>66</sup>. Target genes  
468 were cloned into pLenti-III or pLVX viral expression vectors which were co-transfected with  
469 psPAX2 and pCMV-VSVG into HEK293FT cells to generate lentiviral particles. The lentiviral  
470 particles were then concentrated using Lenti-X. The resulting lentivirus solution was added to  
471 cells and supplemented with 8µg/mL polybrene. The cells were then selected using the  
472 appropriate antibiotics (Puromycin (#p7255, Sigma Aldrich) or Zeocin (#R25001, Invitrogen)).

#### 473 Knockout cell line generation and validation

474 GRAMD1C knockout cells were generated using the PX459 system<sup>67</sup>. In short, U2OS cells were  
475 transfected with the PX459 vector expressing guides against GRAMD1C. Guide sequences were  
476 designed using CHOPCHOP<sup>68</sup>. 24 hrs post transfection, transfected cells were selected with  
477 3 µg/ml puromycin for 72 hrs. Single cell clones are then selected using limited dilution into 96  
478 well tissue culture plates. Due to a lack of an antibody that recognizes endogenous GRAMD1C,  
479 validation of the knockout clones was done by sequencing of the relevant region of GRAMD1C  
480 from genomic DNA. A total of 15 sequencing reactions were done, all of which indicated a  
481 frameshift mutation (E245S\*fs20) (Supplementary figure 2b).

#### 482 siRNA knockdown

483 siRNA mediated knockdown was preformed using reverse transfection of siRNA against the target  
484 gene at a final concentration of 10nM per oligonucleotide. siRNAs were delivered using

485 Lipofectamine RNAi max (Invitrogen). After 24 hrs, the cells were washed and replenished with  
486 normal media. Cells stably expressing inducible mCherry-EGFP-LC3b and MLS-mCherry-EGFP  
487 were supplemented with media containing 100 ng/ml Doxycycline. At 72 hrs, the cells are then  
488 treated as described in the figure legends.

489 Due to the lack of reliable antibodies for endogenous GRAMD1C, knockdown was validated using  
490 qPCR against GRAMD1C (Supplementary figure 2a).

#### 491 ROS measurement

492 U2OS cells were transfected as described above. Upon 48 hrs post transfection, cells were plated  
493 in 12-well plates and left in the incubator O/N. Upon 72 hrs post transfection cells were treated  
494 with CellRox (#C10422, Thermo Fischer) for 10 minutes according to manufacturer's instructions.  
495 After washing cells were trypsinised, washed in PBS twice and analyzed using the BD™ LSR II flow  
496 cytometer. A total of three experiments in duplicates were performed and fluorescent signal was  
497 analyzed using FlowJo.

#### 498 Wound healing assay

499 768-O renal carcinoma cells were transiently transfected as described above. Transfected cells  
500 were seeded at 96 well-plates (#4379, Essen Bioscience) 48 hrs post transfection. A total of  $4 \times 10^4$   
501 cells/well were seeded in triplicates at approximately 100% well-density. At 72 hrs post  
502 transfection one scratch per well was made using the Incucyte® 96-well WoundMaker Tool  
503 (#4563, Sartorius). Plate was then loaded in the Incucyte incubator. One image every 20 minutes  
504 for a total of 24 hrs was acquired for each well. Results were analyzed using the Integrated Cell  
505 Migration analysis module (#9600-0012, Sartorius).

#### 506 Microscopy and sample preparation

507 Cells were seeded on glass coverslips or onto glass bottom 96 well imaging plates and treated as  
508 indicated. The cells were then washed twice in prewarmed PBS prior to the addition of warmed  
509 fixation solution (3.7% PFA, 200 mM HEPES pH 7.1) and incubated at 37°C for 20 mins. The fixed  
510 cells were then washed 3 times with PBS. Cells destined for immunofluorescence staining were  
511 permeabilized with 0.2% NP-40 in PBS for 5 mins. The cells were then washed twice in PBS and  
512 incubated in 5% BSA in PBS for 30 mins. The cells were incubated at 20°C for 1h in primary

513 antibody diluted in 5% BSA in PBS. The cells were then washed 3 times with PBS and incubated  
514 in secondary antibody diluted in 5% BSA in PBS at 20°C for 45 mins. The samples were then  
515 washed with PBS. Coverslips were mounted on cover slides using Prolong Diamond Antifade  
516 Mounting Solution and wells of the 96-well imaging plate were filled with PBS to prevent cells  
517 from drying out.

518 Quantitative spot counting of ATG13, ATG13, WIPI2 and LC3 immunostained cells was carried out  
519 using a Zeiss AxioObserver microscope (Zen Blue 2.3 Zeiss) fitted with a 20x Objective (NA 0.5).  
520 The samples were illuminated using a solid-state light source (Colibri 7) and multi-bandpass filters  
521 (BP425/30, 534/50, 688/145). Imaging of cells expressing MLS-mCherry-EGFP, and mCherry-  
522 EGFP-LC3b, was done using the ImageXpress Micro Confocal (Molecular Devices) using a 20x  
523 objective (NA 0.45). Confocal images were take using the Zeiss LSM 800 microscope (Zen Black  
524 2012 SP5 FP3, Zeiss) equipped with at 63x oil immersion objective (NA 1.4). Samples were  
525 illuminated using a laser diode (405nm), AR-Laser Multiline (458/488/514nm), DPSS (561nm) and  
526 HeNe-Laser (633nm). Live cell confocal imaging was done with cells in a humidified chamber at  
527 37°C supplemented with 5%CO<sub>2</sub> on the Dragonfly (Oxford Instrumentals) with a 60x objective  
528 (NA 1.4) using a EMCCD camera. For live cell imaging, the cells were treated as indicated in the  
529 figure legend, before replacing the culture media with FluoroBrite DMEM (#A1896701, Thermo  
530 Fisher).

### 531 Bioimage analysis

532 ATG16, ATG13, WIPI2 and LC3 puncta were quantified using the CellProfiler software (2.2.0, 3.1.9  
533 and 4.07, Broad Institute)<sup>69,70</sup>. The nuclei were determined using manual thresholding and object  
534 identification of the nuclear stain, and the cells were defined based on a set distance from the  
535 center of the nuclei and was confirmed by comparing to the background cytosolic staining of the  
536 other channels. Puncta were determined using manual thresholding, object enhancement and  
537 object identification. For analysis of mCherry-EGFP-LC3b and mCherry-EGFP-MLS cells, red-only  
538 structures were determined by weighting the red signal to match the green signal and by dividing  
539 the weighted red signal by the green signal using the CellProfiler software (2.2.0, 3.1.9 and 4.07,  
540 Broad Institute). Values that are larger than 1 will represent mitochondria/LC3 structures that  
541 have a stronger red signal compared to the green signal. The resulting analysis was manually

542 compared to the image to confirm the accuracy of the imaging pipeline. A value of 1.5  
543 corresponds to twice the signal of red compared to the green.

#### 544 cDNA synthesis and RT-PCR

545 RNA was isolated using the RNeasy plus kit (Qiagen) according to manufacturer's instructions.  
546 RNA integrity was confirmed by agarose gel prior to cDNA synthesis. cDNA was synthesized using  
547 SuperScript II reverse transcriptase (Thermo Fisher) and real time quantitative PCR was carried  
548 out using SYBR Green Real Time PCR master mix (Qiagen). Normalization of target genes were  
549 done against TATA-box-binding protein (TBP) using the  $2^{-\Delta\Delta Ct}$  method.

#### 550 Western blotting

551 Cells were treated as indicated in the figure legends before being washed twice in ice cold PBS.  
552 The cells were then lysed in NP-40 lysis buffer (50 mM HEPES pH 7.4, 150 mM NaCl, 1 mM EDTA,  
553 10 % glycerol, 0.5 % NP-40, Phosphatase inhibitor and Complete Protease inhibitor Cocktail  
554 (Roche)). The protein concentration of the lysates was measured with BCA assay (Thermo Fisher).  
555 The lysates were run on an SDS-PAGE at 20-30  $\mu$ g of protein per well before transfer to a PVDF  
556 membrane. Blocking was done using a PBS blocking solution (Licor). The resulting membrane was  
557 then incubated using the specified primary and secondary antibodies. Visualization of the bound  
558 far-red secondary antibodies was performed using the Odyssey CLx imaging system (Licor), and  
559 densitometric quantification was performed using the ImageStudio Lite software (Licor).

#### 560 Oxygen consumption rate measurement

561 U2OS cells resuspended in complete DMEM were seeded into Seahorse XFe24 Cell Culture  
562 microplates at a concentration of  $3.5 \times 10^4$  cells per well. The plate was incubated in a humidified  
563 incubator at 37°C for 12 hr. The media was then replaced with DMEM without Sodium  
564 Bicarbonate (pH 7.4) before analysis with the Seahorse XFe24 Analyzer according to  
565 manufacturer's instructions (XF mito stress test, Agilent). DMEM containing specific  
566 mitochondrial inhibitors were loaded into the injector ports of the Seahorse Sensor Plates to  
567 obtain the following final concentrations per well (CCCP: 1  $\mu$ M, Oligomycin: 1.5  $\mu$ M, Rotenone:  
568 0.5  $\mu$ M, Antimycin A: 0.5  $\mu$ M). After the analysis, the cells were washed in ice cold PBS and lysed  
569 for protein quantification using BCA Assay (Thermo Fisher). Quantification was conducted on the

570 Seahorse Analytics software (seahorseanalytics.agilent.com, Agilent), using the measured  
571 protein concentration from each well for normalization.

### 572 Mitochondria isolation

573 Mitochondria were isolated using two different methods. For percoll density gradient isolation,  
574 cells are scraped with ice cold mitochondrial isolation buffer (5 mM Tris-HCl pH 7.4, 210 mM  
575 mannitol, 70 mM Sucrose, 1 mM EDTA, 1 mM DTT, 1X PhosStop, 1x PIC) and mechanically lysed  
576 using a cell homogenizer (Isobiotech) equipped with a 16 µm clearance ball by passing the cell  
577 suspension 10 times through the homogenizer. The resulting solution was then centrifuged at  
578 1500 xg for 5 mins at 4 °C to pellet nucleus and unbroken cells. The suspension was then  
579 centrifuged at 14000 xg for 20 mins to obtain a crude mitochondrial pellet. The pellet was then  
580 resuspended in mitochondrial isolation buffer and layered above a premade percoll gradient of  
581 50 %, 22 % and 15 % in a 5 ml ultracentrifuge tube. The tube was then centrifuged at 30000 xg  
582 for 1 h. A white layer between the 50 % and 22 % gradient is isolated using a syringe and needle.  
583 Percoll was separated from the isolated mitochondrial fraction by washing in mitochondrial  
584 isolation buffer and centrifugation at 14000 xg for 15 mins for 4-5 times. After the final wash, the  
585 pellet containing isolated mitochondria was lysed with RIPA lysis buffer.

586 For affinity purification of mitochondria, mitochondria were isolated from cells stably expressing  
587 3xHA-EGFP-OMP25 according to Walter et al<sup>71</sup> with minor modifications. In short, cells were  
588 scraped in ice cold KPBS (136 mM KCl, 10mM KH<sub>2</sub>PO<sub>4</sub>, pH 7.25) and mechanically lysed using a  
589 cell homogenizer (Isobiotech) equipped with a 16 µm clearance ball by passing the cell  
590 suspension 10 times through the homogenizer. The resulting solution is then centrifuged at  
591 1500 xg for 5 mins at 4 degrees to pellet nucleus and unbroken cells. The supernatant was then  
592 incubated with anti-HA magnetic beads (Thermo Fisher) for 5 mins, before washing with KPBS  
593 and resuspension in 2x SDS Page loading buffer.

### 594 Cholesterol quantification

595 Cholesterol quantification was done using the Cholesterol / Cholesteryl Ester Assay Kit (Abcam,  
596 ab65359). Briefly, cells were washed twice in ice cold PBS, scrapped, and spun down. The  
597 resulting cell pellet was then resuspended with Chloroform:Isopropanol:NP-40 (7:11:0.1) to

598 extract lipids. The mixture was then air dried at 50 °C to remove the chloroform. The resulting  
599 lipids were analyzed according to manufacturer's instructions. The resulting values were  
600 normalized to proteins measured by BCA assay.

#### 601 Mitochondrial cholesterol mCherry-D4 assay

602 Isolated mitochondria were incubated in Mitochondria Isolation Buffer 100 µg/mL of mCherry-  
603 D4 ± 5 mM MBCD at 37 degrees for 30 mins. The mitochondria were then washed 3 times in  
604 mitochondria isolation buffer and lysed with 2x SDS-page loading buffer and immediately  
605 subjected to western blot analysis.

#### 606 Mitochondrial structure classification

607 Cells stably expressing IMLS were treated with siRNA against the GRAMs, OPA1 and DRP1. After  
608 72 hrs of knockdown, the cells were fixed and imaged. In these cells, only DAPI and the EGFP  
609 signals were measured. The mitochondrial intensity distribution, texture, shape, and area was  
610 measured using CellProfiler. The results were used in CellProfiler Analyst (v2.2.1, Broad  
611 Institute)<sup>72,73</sup> to classify mitochondrial morphology. Mitochondria of siOPA1 and siDRP1 cells  
612 represented fragmented and tubular phenotypes respectively. The classifier was trained with a  
613 confusion matrix >0.90 for each phenotype.

#### 614 Long-lived protein degradation

615 Cells were incubated in complete DMEM supplemented with 0.25 µCi/mL L-<sup>14</sup>C-valine (Perkin  
616 Elmer) for 24 hr. The radioactive media was then removed, and the cells were washed three times  
617 with complete DMEM supplemented with 10mM L-Valine, and finally chased for 16 hr in  
618 complete DMEM supplemented with 10 mM L-valine. The cells were then washed three times in  
619 PBS and either starved in EBSS or not for 4 hrs, in the presence or absence of 100 nM BafA1. The  
620 supernatant was collected into tubes containing 15% trichloroacetic acid before subsequent  
621 incubation at 4°C for 12 hr. The cells remaining in the dish were lysed with 0.2 M KOH. The  
622 supernatant was recovered by centrifugation. The supernatant and the cell lysate were added  
623 into separate scintillation tubes containing Ultima Gold LSC cocktail (Perkin Elmer) and the  
624 radioactivity was measured by a TriCarb 3100TR liquid scintillation counter (Perkin Elmer). Long-

625 lived protein degradation was calculated by dividing the radioactivity in the supernatant fraction  
626 by the total radioactivity in both the supernatant and cell lysate.

#### 627 Co-IP Mass spec

628 Cells expressing GRAMD1C-EGFP or GRAMD1C( $\Delta$ GRAM)-EGFP were lysed with NP-40 lysis buffer  
629 (150 mM, 1.0% NP-40, 50 mM Tris-HCl pH 8.0) supplemented with PhosStop phosphatase  
630 inhibitor (Sigma) and complete protease inhibitor cocktail (Sigma). Co-immunopurification was  
631 then carried out using EGFP-TRAP (Chromotek) according to manufacturer's instructions. The  
632 resulting beads with the coprecipitated proteins were washed twice with 50mM ammonium  
633 bicarbonate. Proteins on beads were reduced and alkylated and further digested by trypsin for  
634 overnight at 37 degree. Digested peptides were transferred to new tube, acidified and the  
635 peptides were de-salted for MS analysis.

#### 636 LC-MS/MS

637 Peptides samples were dissolved in 10ul 0.1% formic buffer and 3 ul loaded for MS analysis. LC-  
638 MS/MS analysis of the resulting peptides was performed using an Easy nLC1000 liquid  
639 chromatography system (Thermo Electron, Bremen, Germany) coupled to a QExactive HF Hybrid  
640 Quadrupole-Orbitrap mass spectrometer (Thermo Electron) with a nanoelectrospray ion source  
641 (EasySpray, Thermo Electron). The LC separation of peptides was performed using an EasySpray  
642 C18 analytical column (2  $\mu$ m particle size, 100 Å, 75  $\mu$ m inner diameter and 25 cm ; Thermo Fisher  
643 Scientific). Peptides were separated over a 90 min gradient from 2% to 30% (v/v) ACN in 0.1%  
644 (v/v) FA, after which the column was washed using 90% (v/v) ACN in 0.1% (v/v) FA for 20 min  
645 (flow rate 0.3  $\mu$ L/min). All LC-MS/MS analyses were operated in data-dependent mode where  
646 the most intense peptides were automatically selected for fragmentation by high-energy  
647 collision-induced dissociation.

648 Raw files from LC-MS/MS analyses were submitted to MaxQuant 1.6.17.0 software<sup>74</sup> for  
649 peptide/protein identification. Parameters were set as follow: Carbamidomethyl (C) was set as a  
650 fixed modification and PTY; protein N-acetylation and methionine oxidation as variable  
651 modifications. First search error window of 20 ppm and mains search error of 6 ppm. Trypsin  
652 without proline restriction enzyme option was used, with two allowed miscleavages. Minimal

653 unique peptides were set to one, and FDR allowed was 0.01 (1%) for peptide and protein  
654 identification. The Uniprot human database was used. Generation of reversed sequences was  
655 selected to assign FDR rates. Further analysis was performed with Perseus<sup>75</sup>, limma<sup>76</sup>, Package R  
656 <sup>77</sup>. Volcano plots were plotted with EnhancedVolcano<sup>78</sup>. The gene ontology (GO) analysis was  
657 performed with shinyGO <sup>79</sup>.

#### 658 TCGA data

659 Survival data and cancer stage from all samples in the TCGA-KIRC (clear cell renal cell carcinoma,  
660 data release 27.0) cohort was downloaded with the TCGABiolinks R package<sup>80</sup>. Survival curve  
661 comparisons were carried out in GraphPad Prism 8.0.1 using Log-rank (Mantel-Cox) test.

#### 662 Sequence alignment

663 The GRAM domain sequences of each GRAM protein were obtained from Uniprot, which were  
664 then aligned using Clustal Omega<sup>81</sup> and BlastP<sup>82</sup>.

#### 665 Crystal violet staining

666 786-O cells were seeded into 6 well and 24 well plates in quadruplicates and treated as indicated.  
667 After 3 weeks, the cells are fixed in staining solution (6% Glutaraldehyde, 0.5% Crystal Violet) for  
668 1 hr at room temperature. The fixation solution was removed, and the cells were rinsed by  
669 multiple gentle immersion in H<sub>2</sub>O. The stained cells were then imaged on a BioRad ChemiDoc MP  
670 analyzer. Quantification of colony area was done using ImageJ software.

#### 671 Statistics and significance

672 Statistical analysis was carried out using Prism (8.01) using the test as indicated in the figure  
673 legends. All relevant statistical tests are described in the figure legends and all data values come  
674 from distinct samples. \*\*\*\* =  $p > 0.0001$ , \*\*\* =  $p > 0.001$ , \*\* =  $p > 0.01$ , \* =  $p > 0.05$  or N.S. = not  
675 significant.

#### 676 Primers used in this study

| Target         | Usage | Forward (5'→3')        | Reverse (5'→3')      |
|----------------|-------|------------------------|----------------------|
| <i>TBP</i>     | qPCR  | CAGAAAGTTCATCCTCTGGGCT | TATATTCGGCGTTTCGGGCA |
| <i>GRAMD1C</i> | qPCR  | GTCCTTTTACCGTCTCCGCC   | AGTCTCGGAGCACTCCCTTA |



|                |       |                                                            |                         |
|----------------|-------|------------------------------------------------------------|-------------------------|
| GRAMD1C        | sgRNA | TAATACGACTCACTATAGAACCCGACTAATTGATTCACGTTTTAGAGCTAGAAATAGC |                         |
| <i>DHCR24</i>  | qPCR  | CGATGCACTCCGTCCGAAAA                                       | GATGATGCGGATCTCAGCGG    |
| <i>DHCR7</i>   | qPCR  | ATCGCTGACATCATCCGGGG                                       | TAAAGTCCTGCGCCACCTTC    |
| <i>HSD17B7</i> | qPCR  | CTTCCAGCACAGCAAAGGCA                                       | CCACATTGGAATAGAGACCCTGC |
| <i>HMGCR</i>   | qPCR  | GCCCTCAGTTCCAACCTACA                                       | CAAGCTGACGTACCCCTGAC    |
| <i>MVD</i>     | qPCR  | CGTAAGTGGCTGTGGAGCTG                                       | CGTAAGTGGCTGTGGAGCTG    |

677

678 Plasmids used in this study

| Vector                                   | Description                                                                                                  | Source                                   |
|------------------------------------------|--------------------------------------------------------------------------------------------------------------|------------------------------------------|
| pENTR3C                                  | Entry vector                                                                                                 | Invitrogen                               |
| pENTR3C-GRAMD1C                          | Cloning human GRAMD1C from cDNA from U2OS into a pENTR3C backbone.                                           | This study                               |
| pENTR3C-GRAMD1C ( $\Delta$ GRAM)         | Cloning human GRAMD1C lacking the GRAM domain into a pENTR3C backbone.                                       | This study                               |
| pLenti-PGK-GRAMD1C-EGFP                  | C-terminal EGFP tagged GRAMD1C expressing lentiviral vector generated using Gibson Assembly.                 | This study                               |
| pLenti-PGK-GRAMD1C ( $\Delta$ GRAM)-EGFP | C-terminal EGFP tagged GRAMD1C ( $\Delta$ GRAM) expressing lentiviral vector generated using Gibson Assembly | This study                               |
| pCMV-VSV-G                               | Envelope protein vector for lentivirus production.                                                           | Gift from Bob Weinberg (Addgene # 8454)  |
| psPAX2                                   | Lentiviral packaging vector for lentivirus production.                                                       | Gift from Didier Trono (Addgene # 12260) |
| pLenti-PGK-EGFP-GRAM domain              | EGFP-GRAM domain cloned from entry vector into a pLenti-PGK vector using Gibson Assembly.                    | This study                               |
| pcDNA5-MLS-EGFP-mCherry                  | Vector for inducible mitophagy reporter using the FlpIn system.                                              | This study                               |

|                                  |                                                                                                                   |            |
|----------------------------------|-------------------------------------------------------------------------------------------------------------------|------------|
| pLenti-PGK-3xHA-EGFP-OMP25       | 3xHA-EGFP-OMP25 vector used for affinity purification of mitochondria. The insert was cloned from <sup>71</sup> . | This study |
| pLenti-PGK-EGFP-BATS             | EGFP-BATS domain cloned from ATG14L plasmid into a pLenti-PGK vector using Gibson Assembly.                       | This study |
| pDest-FlpIn-mCherry-EGFP-GRAMD1C | Doxycycline inducible mCherry-EGFP-GRAMD1C construct generated using gateway cloning.                             | This study |

679

## 680 **Acknowledgements**

681 This work was supported by the Research Council of Norway through its Centre of Excellence  
682 funding scheme (Project: 262652) and FRIPRO grant (Project: 221831), the Norwegian Cancer  
683 Society (Project: 171318), the Marie Skłodowska-Curie (MSC) ETN grant under the European  
684 Union's Horizon 2020 Research and Innovation Programme (Grant Agreement No 765912 DRIVE)  
685 and the UiO Scientia Fellow program through the MSC scheme – Co-funding of Regional, National  
686 and International Programmes (COFUND). The authors would like to thank Sonia Peña Pérez for  
687 help with the graphical abstract and Laura Rodriguez de la Ballina for technical help and  
688 constructive feedback. The authors would also like to thank Sachin Singh and the Proteomics  
689 Core Facility for their assistance with the mass spectrometry based proteomic experiments and  
690 the Norwegian Core Facility for Human Pluripotent Stem Cells at the Norwegian Center for Stem  
691 Cell Research for mycoplasma testing of our cells.

## 692 **Author contributions**

693 M.N., C.C., A.S conceived and planned the experiments. S.S. carried out the analysis of mass spec  
694 data. M.N., C.C., A.L. and L.T.M. performed the experiments and analyzed data. M.N. and A.S.  
695 wrote the manuscript with input from all authors. S.N. provided TCGA data and contributed to  
696 the interpretation of the results. M.J.M. provided critical feedback on the manuscript. All authors  
697 discussed the results and contributed to the final manuscript.

## 698 **Author declarations**

699 The authors do not have anything to declare.

## References

- 1 Fengsrud, M., Erichsen, E. S., Berg, T. O., Raiborg, C. & Seglen, P. O. Ultrastructural characterization of the delimiting membranes of isolated autophagosomes and amphisomes by freeze-fracture electron microscopy. *European Journal of Cell Biology* **79**, 871-882, doi:<https://doi.org/10.1078/0171-9335-00125> (2000).
- 2 de la Ballina, L. R., Munson, M. J. & Simonsen, A. Lipids and Lipid-Binding Proteins in Selective Autophagy. *Journal of Molecular Biology* **432**, 135-159, doi:<https://doi.org/10.1016/j.jmb.2019.05.051> (2020).
- 3 Spinelli, J. B. & Haigis, M. C. The multifaceted contributions of mitochondria to cellular metabolism. *Nat Cell Biol* **20**, 745-754, doi:10.1038/s41556-018-0124-1 (2018).
- 4 Ogasawara, Y. *et al.* Stearoyl-CoA desaturase 1 activity is required for autophagosome formation. *J Biol Chem* **289**, 23938-23950, doi:10.1074/jbc.M114.591065 (2014).
- 5 Ogasawara, Y., Kira, S., Mukai, Y., Noda, T. & Yamamoto, A. Ole1, fatty acid desaturase, is required for Atg9 delivery and isolation membrane expansion during autophagy in *Saccharomyces cerevisiae*. *Biology Open* **6**, 35-40, doi:10.1242/bio.022053 (2017).
- 6 Nath, S. *et al.* Lipidation of the LC3/GABARAP family of autophagy proteins relies on a membrane-curvature-sensing domain in Atg3. *Nat Cell Biol* **16**, 415-424, doi:10.1038/ncb2940 (2014).
- 7 London, E. & Brown, D. A. Insolubility of lipids in triton X-100: physical origin and relationship to sphingolipid/cholesterol membrane domains (rafts). *Biochim Biophys Acta* **1508**, 182-195, doi:10.1016/s0304-4157(00)00007-1 (2000).
- 8 Fernández-Pérez, E. J. *et al.* Effect of Cholesterol on Membrane Fluidity and Association of A $\beta$  Oligomers and Subsequent Neuronal Damage: A Double-Edged Sword. *Frontiers in Aging Neuroscience* **10**, doi:10.3389/fnagi.2018.00226 (2018).
- 9 Punnonen, E.-L., Pihakaski, K., Mattila, K., Lounatmaa, K. & Hirsimäki, P. Intramembrane particles and filipin labelling on the membranes of autophagic vacuoles and lysosomes in mouse liver. *Cell and Tissue Research* **258**, 269-276, doi:10.1007/BF00239447 (1989).
- 10 Liao, Y., Zhang, P., Yuan, B., Li, L. & Bao, S. Pravastatin Protects Against Avascular Necrosis of Femoral Head via Autophagy. *Front Physiol* **9**, 307-307, doi:10.3389/fphys.2018.00307 (2018).
- 11 Wei, Y. M. *et al.* Enhancement of autophagy by simvastatin through inhibition of Rac1-mTOR signaling pathway in coronary arterial myocytes. *Cell Physiol Biochem* **31**, 925-937, doi:10.1159/000350111 (2013).

- 12 Gao, S. *et al.* Atorvastatin activates autophagy and promotes neurological function recovery after spinal cord injury. *Neural Regen Res* **11**, 977-982, doi:10.4103/1673-5374.184498 (2016).
- 13 Wang, W. *et al.* Augmentation of autophagy by atorvastatin via Akt/mTOR pathway in spontaneously hypertensive rats. *Hypertension Research* **38**, 813-820, doi:10.1038/hr.2015.85 (2015).
- 14 Cheng, J., Ohsaki, Y., Tauchi-Sato, K., Fujita, A. & Fujimoto, T. Cholesterol depletion induces autophagy. *Biochemical and Biophysical Research Communications* **351**, 246-252, doi:<https://doi.org/10.1016/j.bbrc.2006.10.042> (2006).
- 15 Naito, H. *et al.* High-fat and high-cholesterol diet decreases phosphorylated inositol-requiring kinase-1 and inhibits autophagy process in rat liver. *Scientific Reports* **9**, 12514, doi:10.1038/s41598-019-48973-w (2019).
- 16 Li, K. *et al.* High cholesterol induces apoptosis and autophagy through the ROS-activated AKT/FOXO1 pathway in tendon-derived stem cells. *Stem Cell Research & Therapy* **11**, 131, doi:10.1186/s13287-020-01643-5 (2020).
- 17 McFarland, A. J. *et al.* Differences in statin associated neuroprotection corresponds with either decreased production of IL-1 $\beta$  or TNF- $\alpha$  in an in vitro model of neuroinflammation-induced neurodegeneration. *Toxicology and Applied Pharmacology* **344**, 56-73, doi:<https://doi.org/10.1016/j.taap.2018.03.005> (2018).
- 18 Seo, Y.-K. *et al.* Genome-wide localization of SREBP-2 in hepatic chromatin predicts a role in autophagy. *Cell Metab* **13**, 367-375, doi:10.1016/j.cmet.2011.03.005 (2011).
- 19 Luo, J., Jiang, L.-Y., Yang, H. & Song, B.-L. Intracellular Cholesterol Transport by Sterol Transfer Proteins at Membrane Contact Sites. *Trends in Biochemical Sciences* **44**, 273-292, doi:10.1016/j.tibs.2018.10.001 (2019).
- 20 Wong, L. H., Gatta, A. T. & Levine, T. P. Lipid transfer proteins: the lipid commute via shuttles, bridges and tubes. *Nature Reviews Molecular Cell Biology* **20**, 85-101, doi:10.1038/s41580-018-0071-5 (2019).
- 21 Naito, T. *et al.* Movement of accessible plasma membrane cholesterol by the GRAMD1 lipid transfer protein complex. *eLife* **8**, e51401, doi:10.7554/eLife.51401 (2019).
- 22 Sandhu, J. *et al.* Aster Proteins Facilitate Nonvesicular Plasma Membrane to ER Cholesterol Transport in Mammalian Cells. *Cell* **175**, 514-529.e520, doi:10.1016/j.cell.2018.08.033 (2018).
- 23 Ferrari, A. *et al.* Aster Proteins Regulate the Accessible Cholesterol Pool in the Plasma Membrane. *Molecular and Cellular Biology* **40**, e00255-00220, doi:10.1128/mcb.00255-20 (2020).

- 24 Laraia, L. *et al.* The cholesterol transfer protein GRAMD1A regulates autophagosome biogenesis. *Nat Chem Biol* **15**, 710-720, doi:10.1038/s41589-019-0307-5 (2019).
- 25 Dai, S. *et al.* Methyl- $\beta$ -cyclodextrin restores impaired autophagy flux in Niemann-Pick C1-deficient cells through activation of AMPK. *Autophagy* **13**, 1435-1451, doi:10.1080/15548627.2017.1329081 (2017).
- 26 Liang, D. *et al.* Effects and Mechanisms of Autophagy Induced by Solubilized-Cholesterol in Hepatocytes: A Comparative Study Among Solvents. *Cell Biochemistry and Biophysics* **78**, 357-366, doi:10.1007/s12013-020-00917-2 (2020).
- 27 Parikh, A. *et al.* Statin-induced autophagy by inhibition of geranylgeranyl biosynthesis in prostate cancer PC3 cells. *Prostate* **70**, 971-981, doi:10.1002/pros.21131 (2010).
- 28 OHTANI, Y., IRIE, T., UEKAMA, K., FUKUNAGA, K. & PITHA, J. Differential effects of  $\alpha$ -,  $\beta$ - and  $\gamma$ -cyclodextrins on human erythrocytes. *European Journal of Biochemistry* **186**, 17-22, doi:<https://doi.org/10.1111/j.1432-1033.1989.tb15171.x> (1989).
- 29 Castellano, B. M. *et al.* Lysosomal cholesterol activates mTORC1 via an SLC38A9–Niemann-Pick C1 signaling complex. *Science* **355**, 1306-1311, doi:10.1126/science.aag1417 (2017).
- 30 Davis, O. B. *et al.* NPC1-mTORC1 Signaling Couples Cholesterol Sensing to Organelle Homeostasis and Is a Targetable Pathway in Niemann-Pick Type C. *Developmental Cell* **56**, 260-276.e267, doi:<https://doi.org/10.1016/j.devcel.2020.11.016> (2021).
- 31 Puente, C., Hendrickson, R. C. & Jiang, X. Nutrient-regulated Phosphorylation of ATG13 Inhibits Starvation-induced Autophagy \*. *Journal of Biological Chemistry* **291**, 6026-6035, doi:10.1074/jbc.M115.689646 (2016).
- 32 Fan, W., Nassiri, A. & Zhong, Q. Autophagosome targeting and membrane curvature sensing by Barkor/Atg14(L). *Proc Natl Acad Sci U S A* **108**, 7769-7774, doi:10.1073/pnas.1016472108 (2011).
- 33 Luhr, M., Sætre, F. & Engedal, N. The Long-lived Protein Degradation Assay: an Efficient Method for Quantitative Determination of the Autophagic Flux of Endogenous Proteins in Adherent Cell Lines. *Bio-protocol* **8**, e2836, doi:10.21769/BioProtoc.2836 (2018).
- 34 Allen, G. F. G., Toth, R., James, J. & Ganley, I. G. Loss of iron triggers PINK1/Parkin-independent mitophagy. *EMBO reports* **14**, 1127-1135, doi:10.1038/embor.2013.168 (2013).
- 35 Narendra, D., Tanaka, A., Suen, D.-F. & Youle, R. J. Parkin is recruited selectively to impaired mitochondria and promotes their autophagy. *J Cell Biol* **183**, 795-803, doi:10.1083/jcb.200809125 (2008).
- 36 Hurley, J. H. & Young, L. N. Mechanisms of Autophagy Initiation. *Annual Review of Biochemistry* **86**, 225-244, doi:10.1146/annurev-biochem-061516-044820 (2017).

- 37 Elbaz-Alon, Y. *et al.* Lam6 Regulates the Extent of Contacts between Organelles. *Cell Reports* **12**, 7-14, doi:<https://doi.org/10.1016/j.celrep.2015.06.022> (2015).
- 38 Besprozvannaya, M. *et al.* GRAM domain proteins specialize functionally distinct ER-PM contact sites in human cells. *eLife* **7**, e31019, doi:[10.7554/eLife.31019](https://doi.org/10.7554/eLife.31019) (2018).
- 39 Maekawa, M. Domain 4 (D4) of Perfringolysin O to Visualize Cholesterol in Cellular Membranes-The Update. *Sensors (Basel)* **17**, 504, doi:[10.3390/s17030504](https://doi.org/10.3390/s17030504) (2017).
- 40 Terešák, P. *et al.* Regulation of PRKN-independent mitophagy. *Autophagy*, 1-16, doi:[10.1080/15548627.2021.1888244](https://doi.org/10.1080/15548627.2021.1888244) (2021).
- 41 Khanna, P., Lee, J. S., Sereemasapun, A., Lee, H. & Baeg, G. H. GRAMD1B regulates cell migration in breast cancer cells through JAK/STAT and Akt signaling. *Scientific Reports* **8**, 9511, doi:[10.1038/s41598-018-27864-6](https://doi.org/10.1038/s41598-018-27864-6) (2018).
- 42 Hao, H. *et al.* Reduced GRAMD1C expression correlates to poor prognosis and immune infiltrates in kidney renal clear cell carcinoma. *PeerJ* **7**, e8205, doi:[10.7717/peerj.8205](https://doi.org/10.7717/peerj.8205) (2019).
- 43 Nabi, S., Kessler, E. R., Bernard, B., Flaig, T. W. & Lam, E. T. Renal cell carcinoma: a review of biology and pathophysiology. *F1000Res* **7**, 307-307, doi:[10.12688/f1000research.13179.1](https://doi.org/10.12688/f1000research.13179.1) (2018).
- 44 Drabkin, H. A. & Gemmill, R. M. Cholesterol and the development of clear-cell renal carcinoma. *Curr Opin Pharmacol* **12**, 742-750, doi:[10.1016/j.coph.2012.08.002](https://doi.org/10.1016/j.coph.2012.08.002) (2012).
- 45 Creighton, C. J. *et al.* Comprehensive molecular characterization of clear cell renal cell carcinoma. *Nature* **499**, 43-49, doi:[10.1038/nature12222](https://doi.org/10.1038/nature12222) (2013).
- 46 van Dam, S., Vösa, U., van der Graaf, A., Franke, L. & de Magalhães, J. P. Gene co-expression analysis for functional classification and gene–disease predictions. *Briefings in Bioinformatics* **19**, 575-592, doi:[10.1093/bib/bbw139](https://doi.org/10.1093/bib/bbw139) (2017).
- 47 Axe, E. L. *et al.* Autophagosome formation from membrane compartments enriched in phosphatidylinositol 3-phosphate and dynamically connected to the endoplasmic reticulum. *J Cell Biol* **182**, 685-701, doi:[10.1083/jcb.200803137](https://doi.org/10.1083/jcb.200803137) (2008).
- 48 Schütter, M., Giavalisco, P., Brodesser, S. & Graef, M. Local Fatty Acid Channeling into Phospholipid Synthesis Drives Phagophore Expansion during Autophagy. *Cell* **180**, 135-149.e114, doi:<https://doi.org/10.1016/j.cell.2019.12.005> (2020).
- 49 Andrejeva, G. *et al.* De novo phosphatidylcholine synthesis is required for autophagosome membrane formation and maintenance during autophagy. *Autophagy* **16**, 1044-1060, doi:[10.1080/15548627.2019.1659608](https://doi.org/10.1080/15548627.2019.1659608) (2020).
- 50 Nishimura, T. *et al.* Autophagosome formation is initiated at phosphatidylinositol synthase-enriched ER subdomains. *Embo j* **36**, 1719-1735, doi:[10.15252/emj.201695189](https://doi.org/10.15252/emj.201695189) (2017).

- 51 Osawa, T. *et al.* Atg2 mediates direct lipid transfer between membranes for autophagosome formation. *Nature Structural & Molecular Biology* **26**, 281-288, doi:10.1038/s41594-019-0203-4 (2019).
- 52 Valverde, D. P. *et al.* ATG2 transports lipids to promote autophagosome biogenesis. *Journal of Cell Biology* **218**, 1787-1798, doi:10.1083/jcb.201811139 (2019).
- 53 Matoba, K. *et al.* Atg9 is a lipid scramblase that mediates autophagosomal membrane expansion. *Nature Structural & Molecular Biology* **27**, 1185-1193, doi:10.1038/s41594-020-00518-w (2020).
- 54 Matsunaga, K. *et al.* Autophagy requires endoplasmic reticulum targeting of the PI3-kinase complex via Atg14L. *Journal of Cell Biology* **190**, 511-521, doi:10.1083/jcb.200911141 (2010).
- 55 Andersen, J.-P. *et al.* Aster-B coordinates with Arf1 to regulate mitochondrial cholesterol transport. *Molecular Metabolism* **42**, 101055, doi:<https://doi.org/10.1016/j.molmet.2020.101055> (2020).
- 56 Eisenberg-Bord, M., Shai, N., Schuldiner, M. & Bohnert, M. A Tether Is a Tether Is a Tether: Tethering at Membrane Contact Sites. *Developmental Cell* **39**, 395-409, doi:<https://doi.org/10.1016/j.devcel.2016.10.022> (2016).
- 57 Hamasaki, M. *et al.* Autophagosomes form at ER-mitochondria contact sites. *Nature* **495**, 389-393, doi:10.1038/nature11910 (2013).
- 58 Garofalo, T. *et al.* Evidence for the involvement of lipid rafts localized at the ER-mitochondria associated membranes in autophagosome formation. *Autophagy* **12**, 917-935, doi:10.1080/15548627.2016.1160971 (2016).
- 59 Zhang, J. *et al.* Aster-C coordinates with COP I vesicles to regulate lysosomal trafficking and activation of mTORC1. *EMBO reports* **21**, e49898, doi:<https://doi.org/10.15252/embr.201949898> (2020).
- 60 Charman, M., Kennedy, B. E., Osborne, N. & Karten, B. MLN64 mediates egress of cholesterol from endosomes to mitochondria in the absence of functional Niemann-Pick Type C1 protein. *Journal of Lipid Research* **51**, 1023-1034, doi:<https://doi.org/10.1194/jlr.M002345> (2010).
- 61 Solsona-Vilarrasa, E. *et al.* Cholesterol enrichment in liver mitochondria impairs oxidative phosphorylation and disrupts the assembly of respiratory supercomplexes. *Redox Biol* **24**, 101214-101214, doi:10.1016/j.redox.2019.101214 (2019).
- 62 Ziolkowski, W. *et al.* Methyl-beta-cyclodextrin induces mitochondrial cholesterol depletion and alters the mitochondrial structure and bioenergetics. *FEBS Letters* **584**, 4606-4610, doi:<https://doi.org/10.1016/j.febslet.2010.10.023> (2010).

- 63 Durhuus, J. A. *et al.* Simvastatin improves mitochondrial respiration in peripheral blood cells. *Scientific Reports* **10**, 17012, doi:10.1038/s41598-020-73896-2 (2020).
- 64 Gebhard, R. L. *et al.* Abnormal cholesterol metabolism in renal clear cell carcinoma. *J Lipid Res* **28**, 1177-1184 (1987).
- 65 Tugnoli, V., Trincherò, A. & Tosi, M. R. Evaluation of the lipid composition of human healthy and neoplastic renal tissues. *Ital J Biochem* **53**, 169-182 (2004).
- 66 Ward, R. J., Alvarez-Curto, E. & Milligan, G. in *Receptor Signal Transduction Protocols: Third Edition* (eds Gary B. Willars & R. A. John Challiss) 21-37 (Humana Press, 2011).
- 67 Ran, F. A. *et al.* Genome engineering using the CRISPR-Cas9 system. *Nature Protocols* **8**, 2281-2308, doi:10.1038/nprot.2013.143 (2013).
- 68 Labun, K. *et al.* CHOPCHOP v3: expanding the CRISPR web toolbox beyond genome editing. *Nucleic Acids Research* **47**, W171-W174, doi:10.1093/nar/gkz365 (2019).
- 69 McQuin, C. *et al.* CellProfiler 3.0: Next-generation image processing for biology. *PLOS Biology* **16**, e2005970, doi:10.1371/journal.pbio.2005970 (2018).
- 70 Carpenter, A. E. *et al.* CellProfiler: image analysis software for identifying and quantifying cell phenotypes. *Genome Biology* **7**, R100, doi:10.1186/gb-2006-7-10-r100 (2006).
- 71 Chen, W. W., Freinkman, E. & Sabatini, D. M. Rapid immunopurification of mitochondria for metabolite profiling and absolute quantification of matrix metabolites. *Nature protocols* **12**, 2215-2231, doi:10.1038/nprot.2017.104 (2017).
- 72 Jones, T. R. *et al.* CellProfiler Analyst: data exploration and analysis software for complex image-based screens. *BMC Bioinformatics* **9**, 482, doi:10.1186/1471-2105-9-482 (2008).
- 73 Jones, T. R. *et al.* Scoring diverse cellular morphologies in image-based screens with iterative feedback and machine learning. *Proceedings of the National Academy of Sciences* **106**, 1826-1831, doi:10.1073/pnas.0808843106 (2009).
- 74 Cox, J. & Mann, M. MaxQuant enables high peptide identification rates, individualized p.p.b.-range mass accuracies and proteome-wide protein quantification. *Nature Biotechnology* **26**, 1367-1372, doi:10.1038/nbt.1511 (2008).
- 75 Tyanova, S. *et al.* The Perseus computational platform for comprehensive analysis of (prote)omics data. *Nature Methods* **13**, 731-740, doi:10.1038/nmeth.3901 (2016).
- 76 Ritchie, M. E. *et al.* limma powers differential expression analyses for RNA-sequencing and microarray studies. *Nucleic Acids Res* **43**, e47, doi:10.1093/nar/gkv007 (2015).
- 77 Team, R. C. R: A language and environment for statistical computing. *R Foundation for Statistical Computing*, <<https://www.R-project.org/>> (2020).



- 78 Kevin Blighe, S. R., Myles Lewis. *EnhancedVolcano: publication-ready volcano plots with enhanced colouring and labeling*, <<https://github.com/kevinblighe/EnhancedVolcano>> (2021).
- 79 Ge, S. X., Jung, D. & Yao, R. ShinyGO: a graphical gene-set enrichment tool for animals and plants. *Bioinformatics* **36**, 2628-2629, doi:10.1093/bioinformatics/btz931 (2019).
- 80 Colaprico, A. *et al.* TCGAbiolinks: an R/Bioconductor package for integrative analysis of TCGA data. *Nucleic Acids Res* **44**, e71, doi:10.1093/nar/gkv1507 (2016).
- 81 Sievers, F. *et al.* Fast, scalable generation of high-quality protein multiple sequence alignments using Clustal Omega. *Mol Syst Biol* **7**, 539-539, doi:10.1038/msb.2011.75 (2011).
- 82 Altschul, S. F., Gish, W., Miller, W., Myers, E. W. & Lipman, D. J. Basic local alignment search tool. *J Mol Biol* **215**, 403-410, doi:10.1016/s0022-2836(05)80360-2 (1990).
- 83 Chen, E. Y. *et al.* Enrichr: interactive and collaborative HTML5 gene list enrichment analysis tool. *BMC Bioinformatics* **14**, 128, doi:10.1186/1471-2105-14-128 (2013).
- 84 Kuleshov, M. V. *et al.* Enrichr: a comprehensive gene set enrichment analysis web server 2016 update. *Nucleic Acids Res* **44**, W90-97, doi:10.1093/nar/gkw377 (2016).

# Figure 1

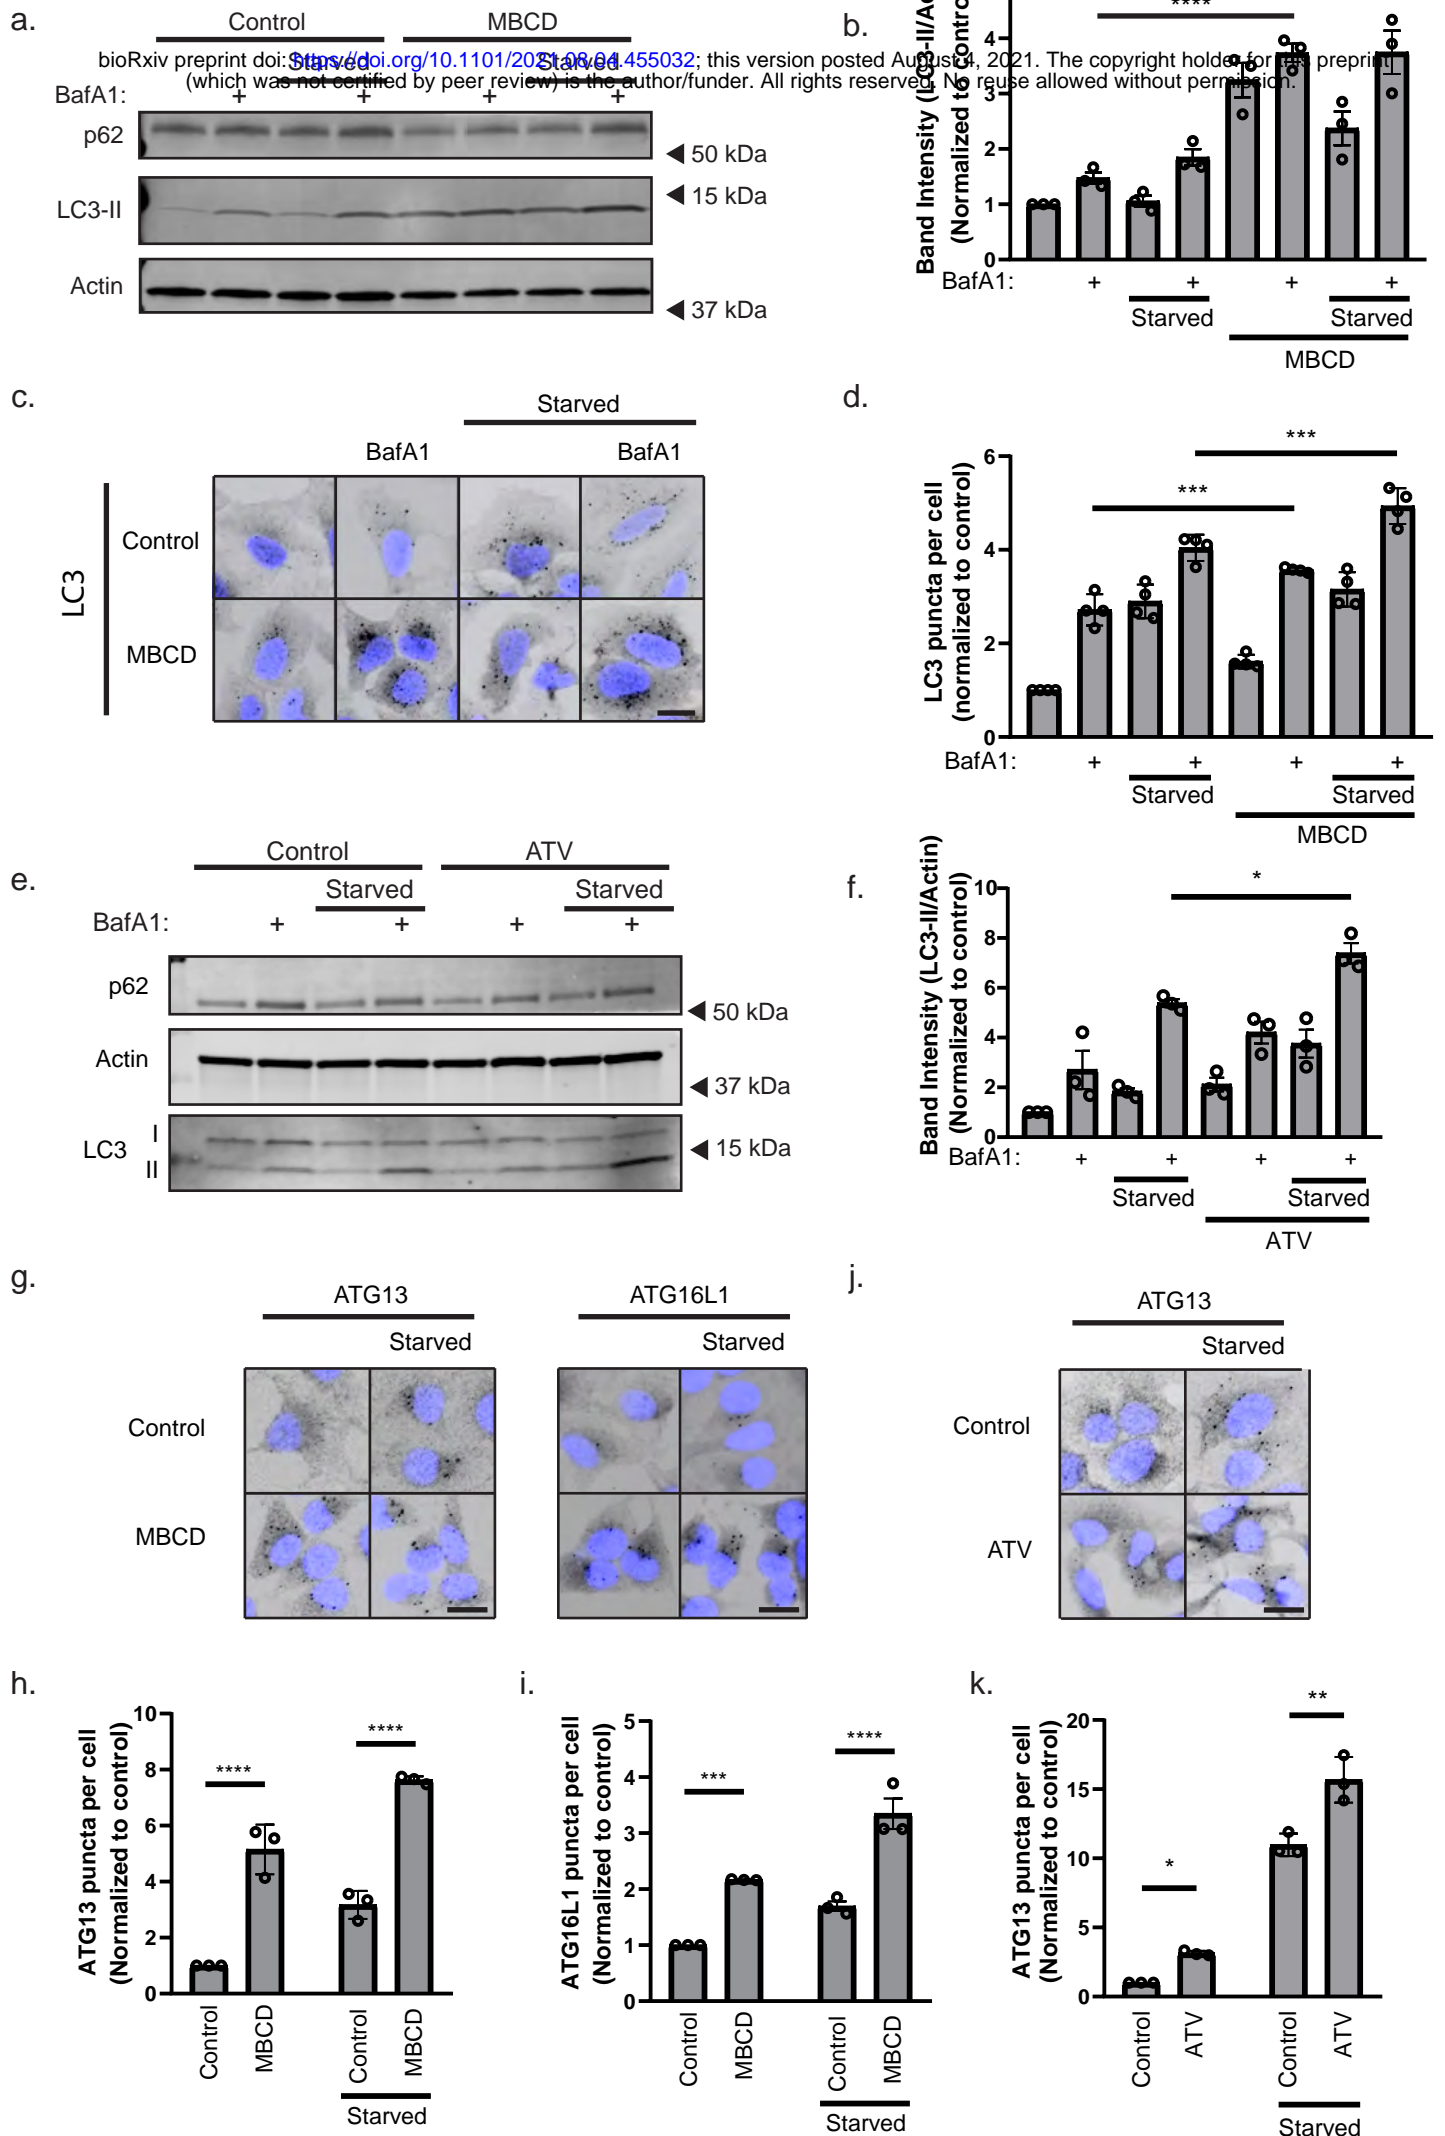

## Figure 1 - Cholesterol depletion promotes autophagy initiation

**a** U2OS cells were treated with 2.5 mM MBCD in serum free DMEM or in EBSS supplemented  $\pm$  100 nM Bafilomycin A1 (BafA1) for 1 hr prior to western blot analysis with the indicated antibodies. **b** Quantification of LC3B-II band intensity relative to actin and normalized to DMEM control. Error bars = SEM. Significance was determined using 1-way ANOVA followed by Tukey's comparisons test from n = 3 experiments. **c** U2OS cells were treated with 2.5 mM MBCD in serum free DMEM or in EBSS supplemented  $\pm$  100 nM BafA1 for 1 hr, prior to immunostaining with anti-LC3B antibody and widefield microscopy. Scale bar = 20 $\mu$ m. **d** Quantification of LC3B puncta number per cell normalized to the DMEM control. Error bars = SEM. Significance was determined using 1-way ANOVA followed by Tukey's comparisons test from n = 4 experiments, >500 cells per condition. **e** U2OS cells were treated with 10  $\mu$ M atorvastatin for 48 hrs, before amino acid starvation in EBSS 1 hr  $\pm$  100 nM BafA1, prior to western blot analysis with the indicated antibodies. **f** Quantification of LC3B-II band intensity relative to actin and normalized to DMEM control. Error bars = SEM. Significance was determined using 1-way ANOVA followed by Tukey's comparisons test from n = 3 experiments. **g** U2OS cells were treated with 2.5 mM MBCD in serum free DMEM or EBSS for 1 hr and then immunostained with antibodies against ATG13 or ATG16L1. Scale bar = 20 $\mu$ m. **h-i** Quantification of data in g. ATG13 (h) and ATG16L1 (i) puncta number per cell were normalized to the DMEM control. Error bars = SEM. Significance was determined using 2-way ANOVA followed by Sidak's comparisons test from n = 3 experiments, >500 cells per condition. **j** U2OS cells were treated with 10  $\mu$ M atorvastatin for 48 hrs, before amino acid starvation in EBSS 1 hr and immunostaining with antibody against ATG13. Scale bar = 20 $\mu$ m. **k** Quantification of data in j. ATG13 puncta number per cell were normalized to the DMEM control. Error bars = SEM. Significance was determined using 2-way ANOVA followed by Sidak's comparisons test from n = 3 experiments, >500 cells per condition. \*\*\*\* = p<0.0001, \*\*\* = p<0.001, \*\* = p < 0.01 and N.S. = not significant.

# Figure 2

bioRxiv preprint doi: <https://doi.org/10.1101/2021.08.04.455032>; this version posted August 4, 2021. The copyright holder for this preprint (which was not certified by peer review) is the author/funder. All rights reserved. No reuse allowed without permission.

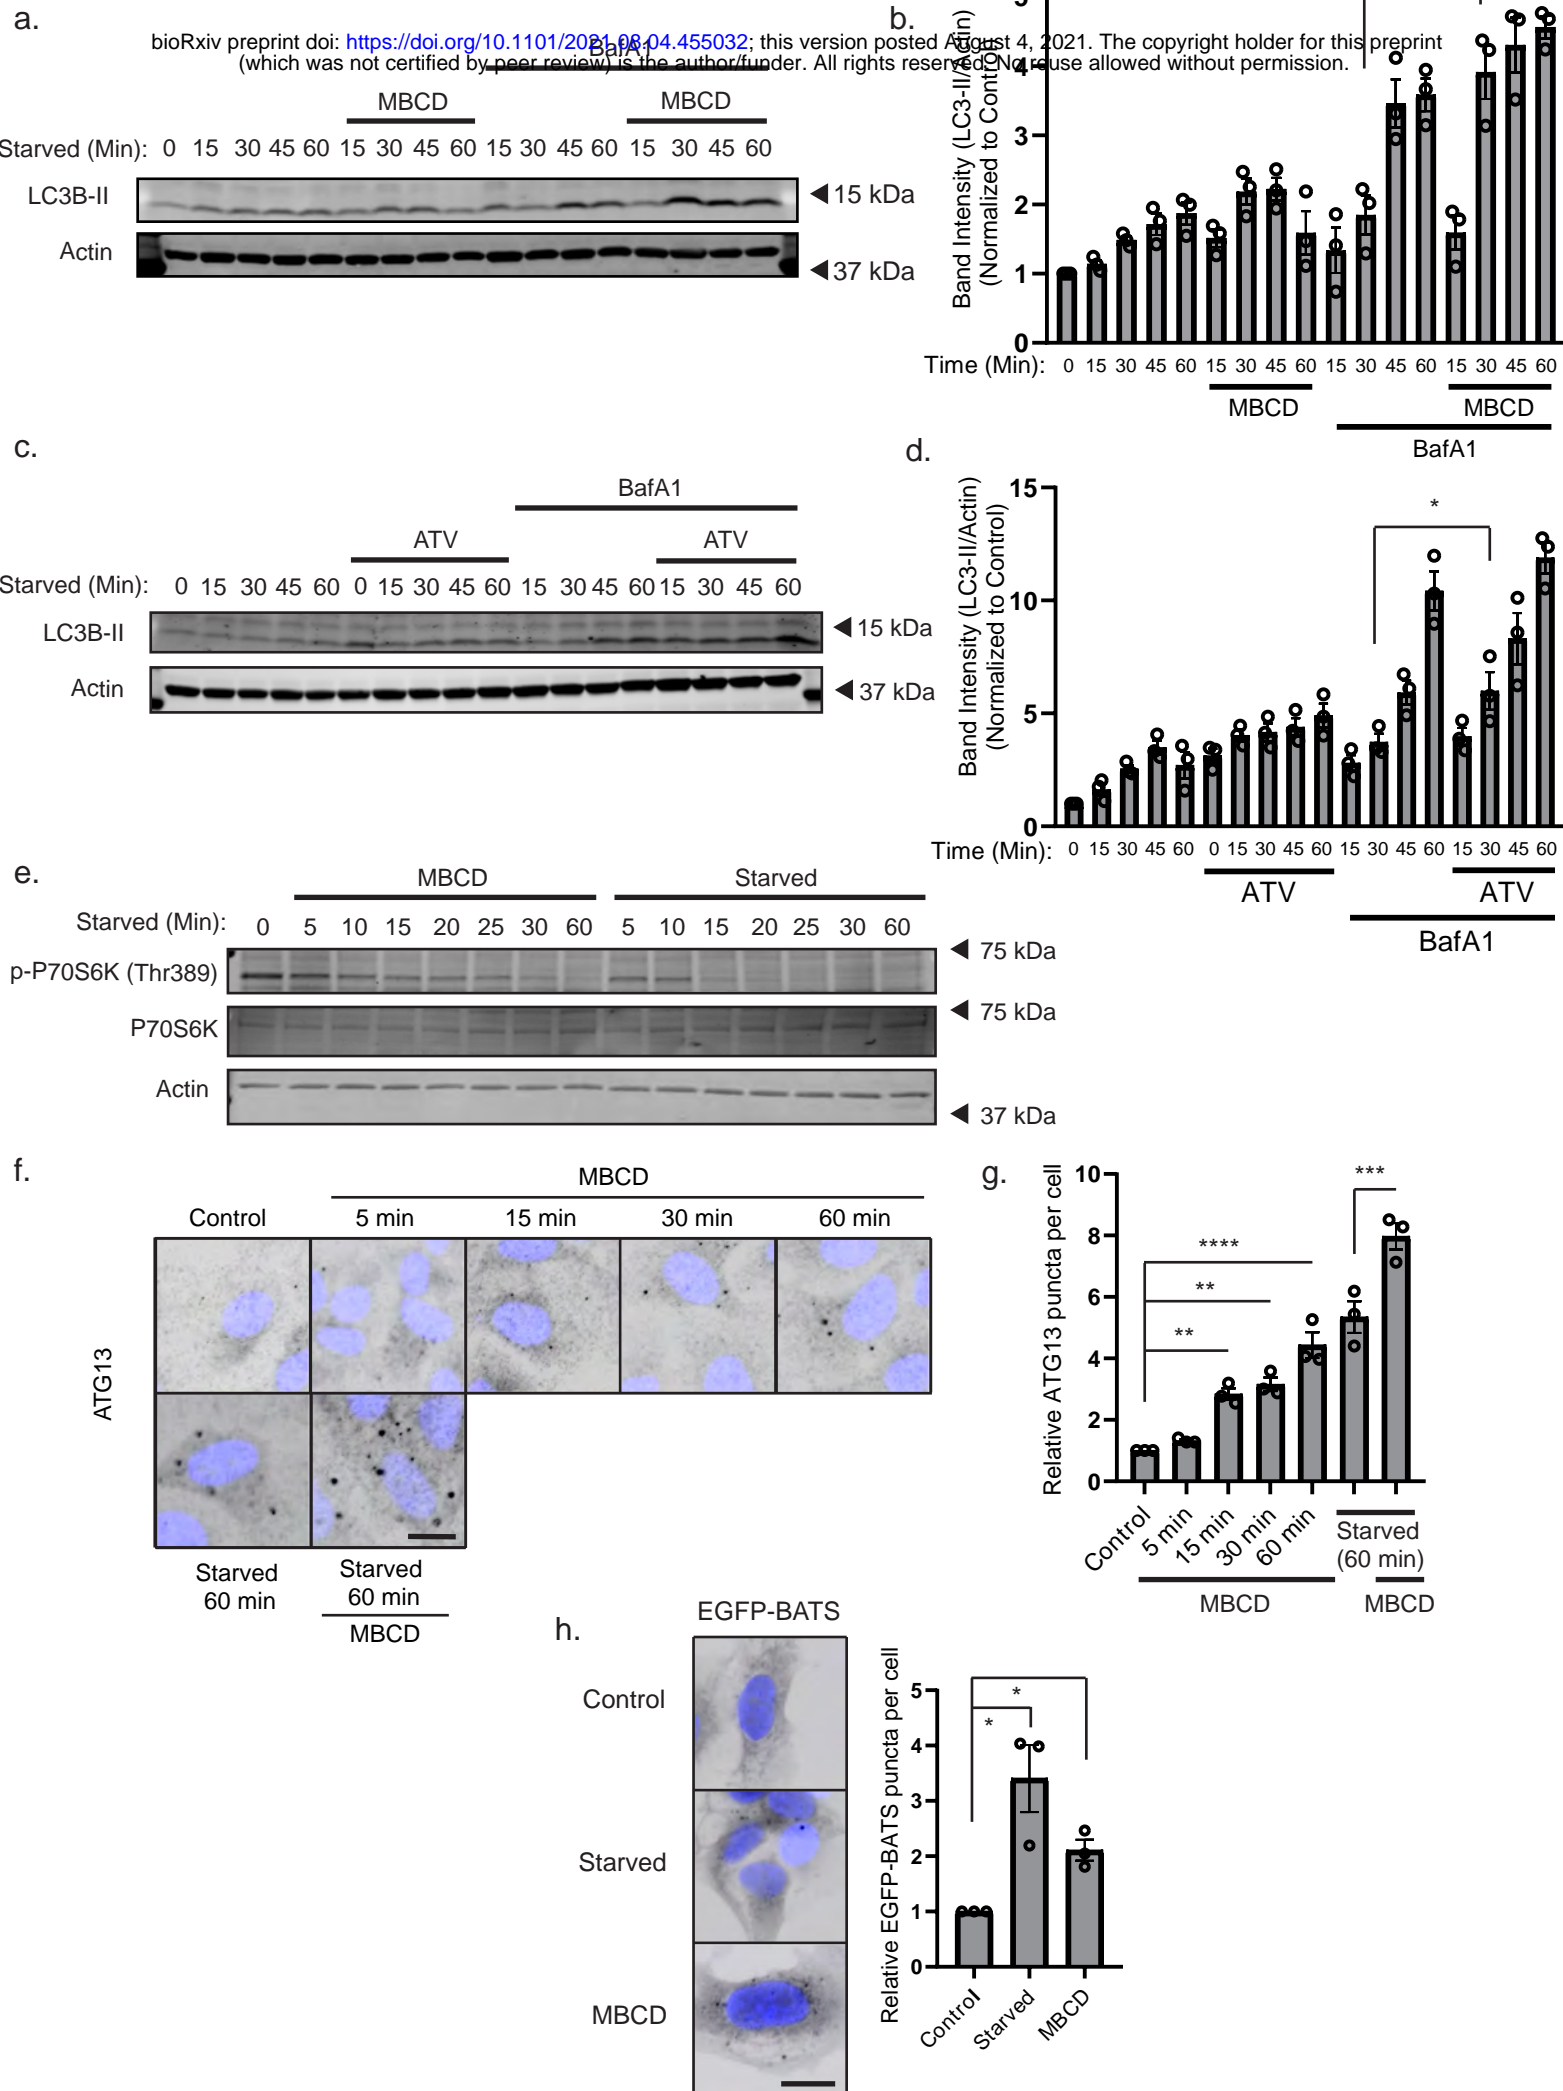

**Figure 2 - Cholesterol depletion alters starvation-induced autophagy dynamics in a mTORC1 independent manner**

**a** U2OS cells were starved in EBSS and treated or not with 2.5 mM MBCD in DMEM  $\pm$  100 nM BafA1 for the indicated times before being lysed and subjected to western blot analysis. **b** Quantification of LC3B-II band intensity relative to Actin and normalized to DMEM control. Error bars = SEM. Significance was determined using 2-way ANOVA followed by Sidak's comparisons test from  $n = 3$  experiments. **c** U2OS cells were treated or not with 10  $\mu$ M ATV for 48 hrs before starvation in EBSS  $\pm$  BafA1 for the indicated times **d** Quantification of data in c. as LC3B-II band intensity relative to Actin and normalized to DMEM control. Error bars = SEM. Significance was determined using 2-way ANOVA followed by Sidak's comparisons test from  $n = 3$  experiments. **e** U2OS cells were treated for the indicated times with either 2.5 mM MBCD in DMEM or EBSS without MBCD before western blot analysis with the indicated antibodies. **f** U2OS cells were treated with 2.5 mM MBCD in DMEM or EBSS for the indicated time before fixation, immunostaining for ATG13 and widefield microscopy. Scale bar = 20  $\mu$ m. **g** Quantification of ATG13 puncta per cell normalized to the control. Error bars = SEM. Significance was determined using 1-way ANOVA followed by Dunnett's comparisons test from  $n = 3$  experiments, >500 cells per condition. **h** Cells expressing EGFP-BATS were incubated in EBSS or serum free DMEM supplemented or not with 2.5 mM MBCD for 1 hr before fixation and widefield microscopy. Error bar = SEM. Scale bar = 20  $\mu$ m. The number of EGFP-BATS puncta per cell was normalized to the DMEM control. Significance was determined using 1-way ANOVA followed by Dunnett's from  $n = 3$  experiments, >500 cells per experiment. \*\*\*\* =  $p < 0.0001$ , \*\*\* =  $p < 0.001$ , \*\* =  $p < 0.01$  and N.S. = not significant.

# Figure 3

a.

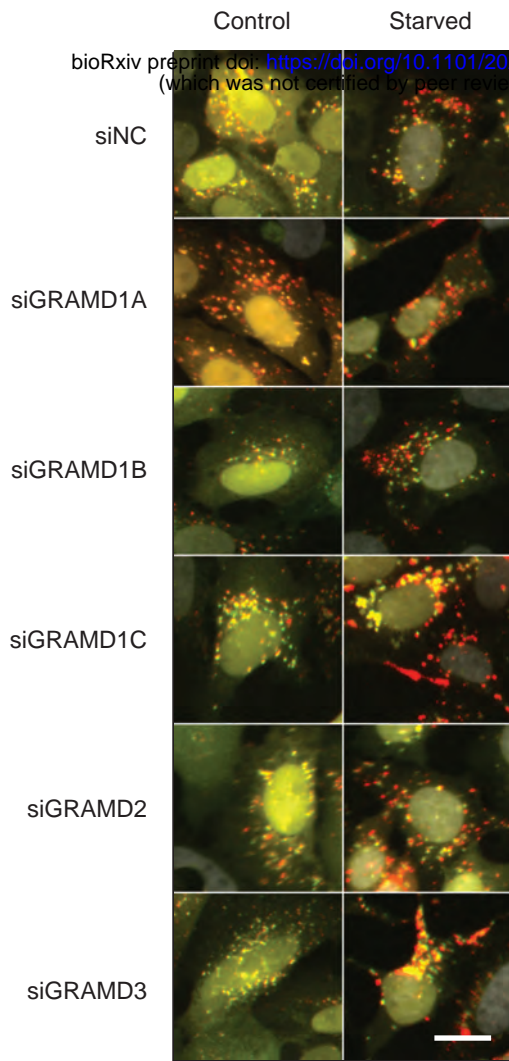

b.

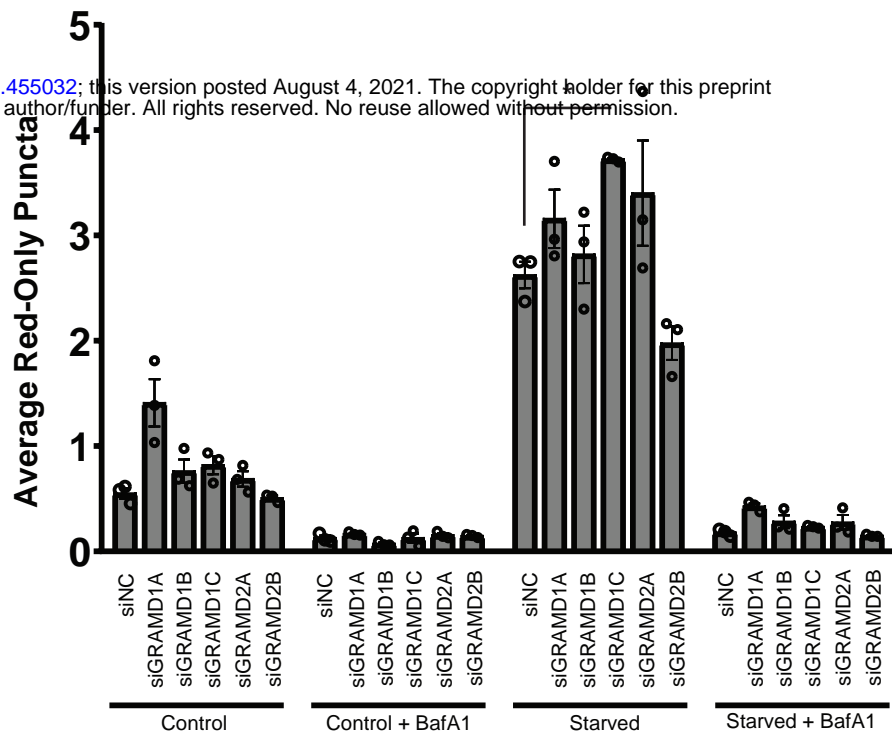

c.

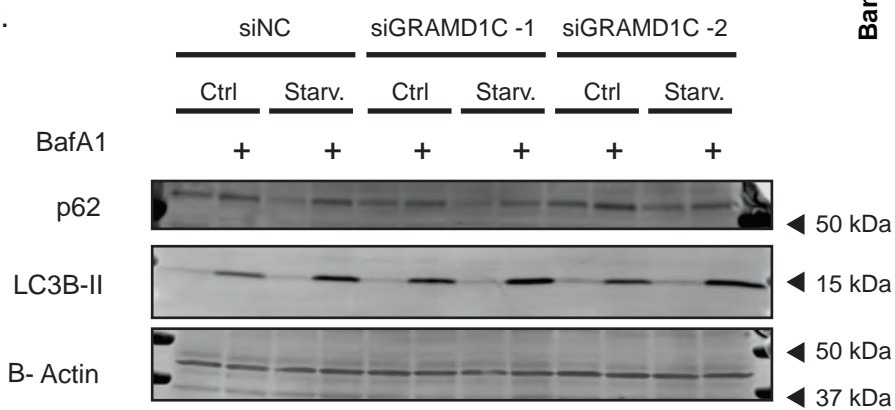

d.

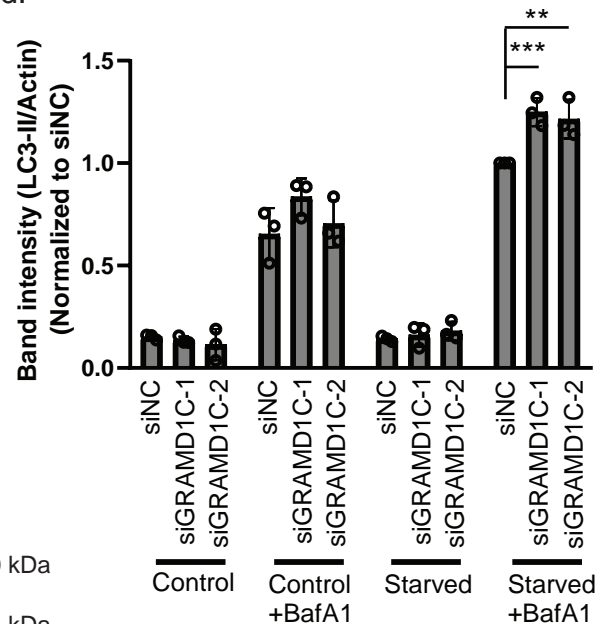

e.

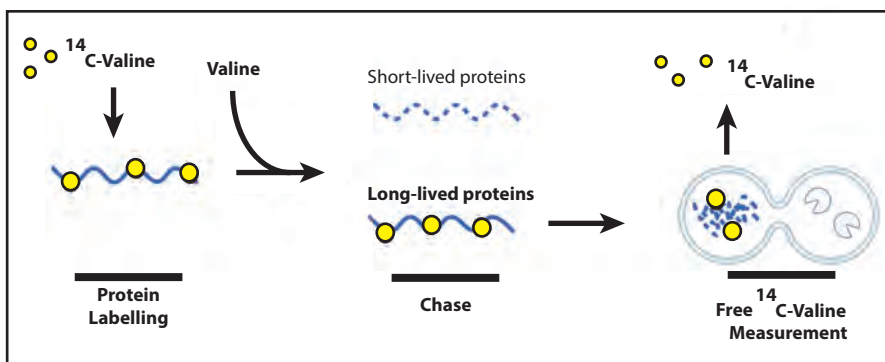

f.

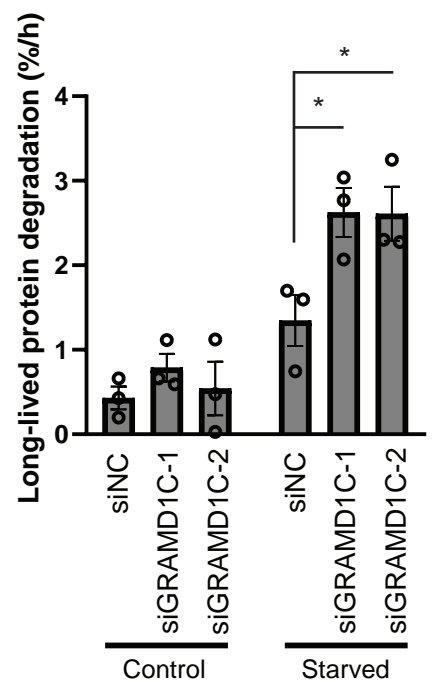

### Figure 3 - GRAMD1C is a negative regulator of starvation-induced autophagy

**a** U2OS cells stably expressing mCherry-EGFP-LC3B were transfected with siRNA against the indicated genes for 72 hrs before serum and amino acid starvation in EBSS for 2 hrs  $\pm$  100 nM BafA1 prior to fixation and widefield microscopy. Scale bar = 20  $\mu$ m. **b** Quantification of data in a. The bars represent the average number of red-only puncta per cell. Significance was determined using 2-way ANOVA followed by Dunnett's comparison test from n = 3 experiments, >500 cells per condition. Error bar = SEM. **c** U2OS cells were transfected with two different siRNA targeting GRAMD1C or a control for 72 hrs, followed by 2 hrs incubation in DMEM (Ctrl) or EBSS (Starv.) for 2 hrs  $\pm$  100 nM BafA1. The cells were then lysed and subjected to western blot analysis against the indicated proteins. **d** Quantification of band intensity of LC3B-II relative to Actin in c. Values are normalized to siNC starved + BafA1. Error bar = SEM. Significance was determined using 2-way ANOVA followed by Tukey's comparison test from n = 3 experiments. **e** LLPD assay: Cells are incubated in culture media supplemented with  $^{14}$ C valine for 24 hrs, then washed and re-incubated in media containing non-radioactive valine for 16 hrs to allow degradation of short-lived proteins. The cells are then starved  $\pm$  100 nM BafA1 for 4 hrs, followed by analysis of radioactive  $^{14}$ C valine in the media and cells using a liquid scintillation counter. **f** U2OS cells were treated with the indicated siRNA and subjected to the LLPD assay. Significance was determined using 2-way followed by Tukey's comparison test from n = 3 samples. \*\*\* =  $p < 0.001$ , \*\* =  $p < 0.01$  and N.S. = not significant.

# Figure 4

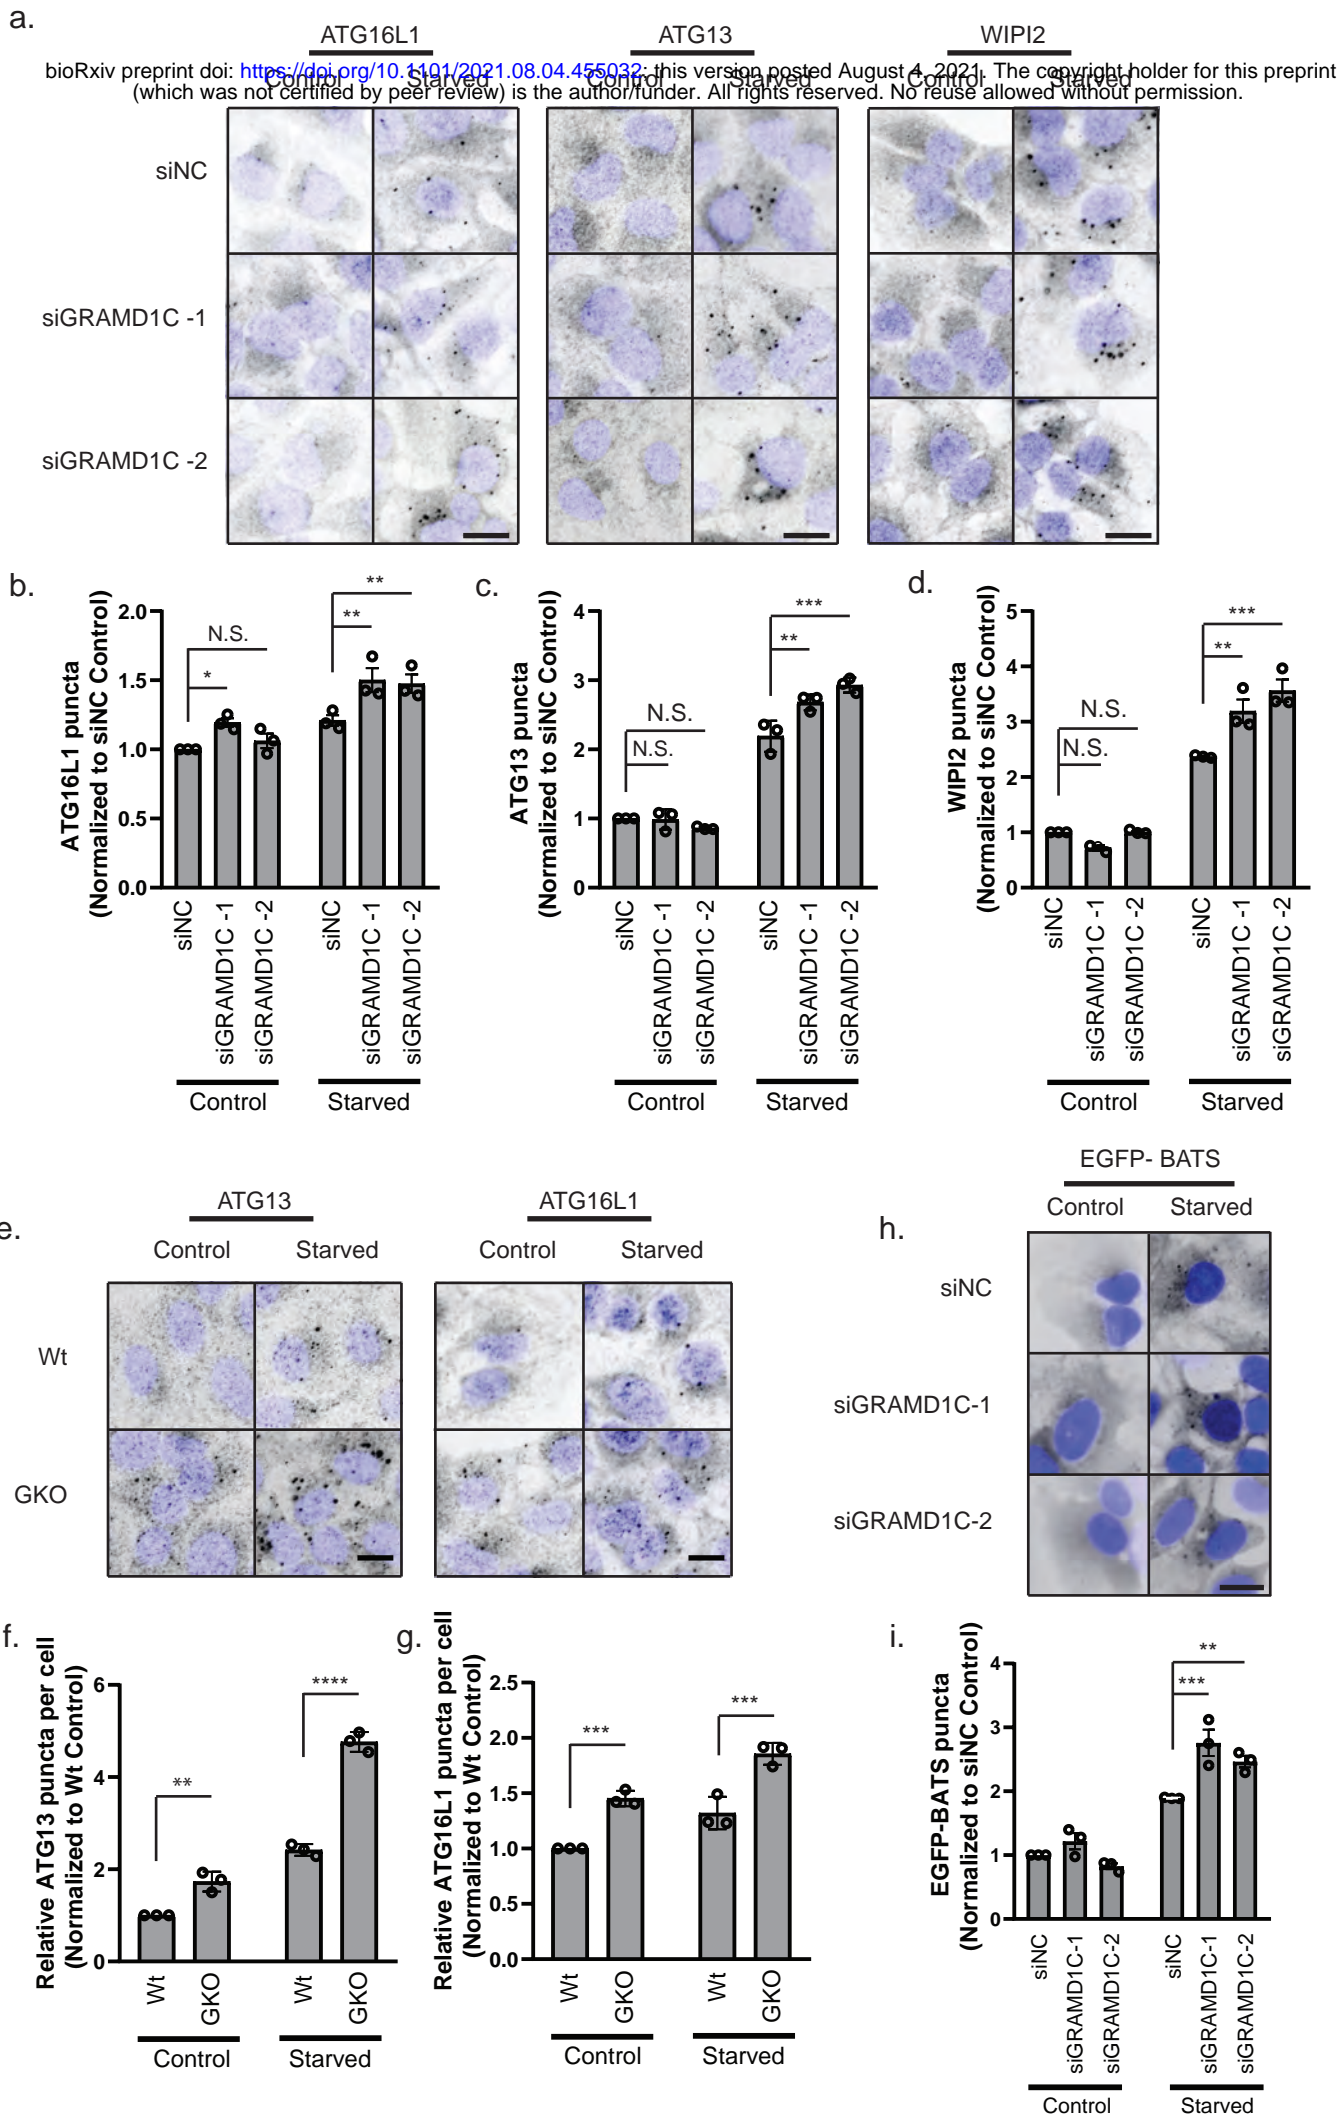



#### Figure 4 - GRAMD1C regulates autophagy initiation during amino acid starvation

**a** U2OS cells were transfected with siRNA against control or GRAMD1C for 72 hrs prior to starvation in EBSS for 1 hr or incubation in DMEM (control). The cells were then fixed, immunostained with antibodies against ATG16L1, ATG13 or WIPI2 and subjected to widefield microscopy. Scale bar = 20 $\mu$ m. The number of **b** ATG16L1, **c** ATG13 and **d** WIPI2 puncta per cell were quantified and normalized to siNC control from n = 3 experiments, >500 cells per condition. Significance was determined using 2-way ANOVA followed by Tukey's comparison test. Error bar = SEM. **e** Wild type (Wt) or GRAMD1C knockout (GKO) U2OS cells were starved or not in EBSS for 1 hr before immunostaining for ATG16L1 or ATG13. Scale bar = 20  $\mu$ m. **f-g** The number of ATG13 (**f**) and ATG16L1 (**g**) puncta per cell were quantified and normalized to Wt control from n = 3 experiments, >500 cells per condition. Significance was determined using 2-way ANOVA followed by Sidak's comparison test. **h** U2OS cells expressing EGFP-BATS were transfected with siRNA against control or GRAMD1C for 72 hrs before starvation in EBSS for 1 hr. Scale bar = 20  $\mu$ m **i** The number of EGFP-BATS puncta per cell was quantified and normalized to siNC control from n = 3 experiments, >500 cells per condition. Significance was determined using 2-way ANOVA followed by Tukey's comparison test. Error bar = SEM. \*\*\*\* = p<0.0001, \*\*\* = p<0.001, \*\* = p < 0.01 and N.S. = not significant.

# Figure 5

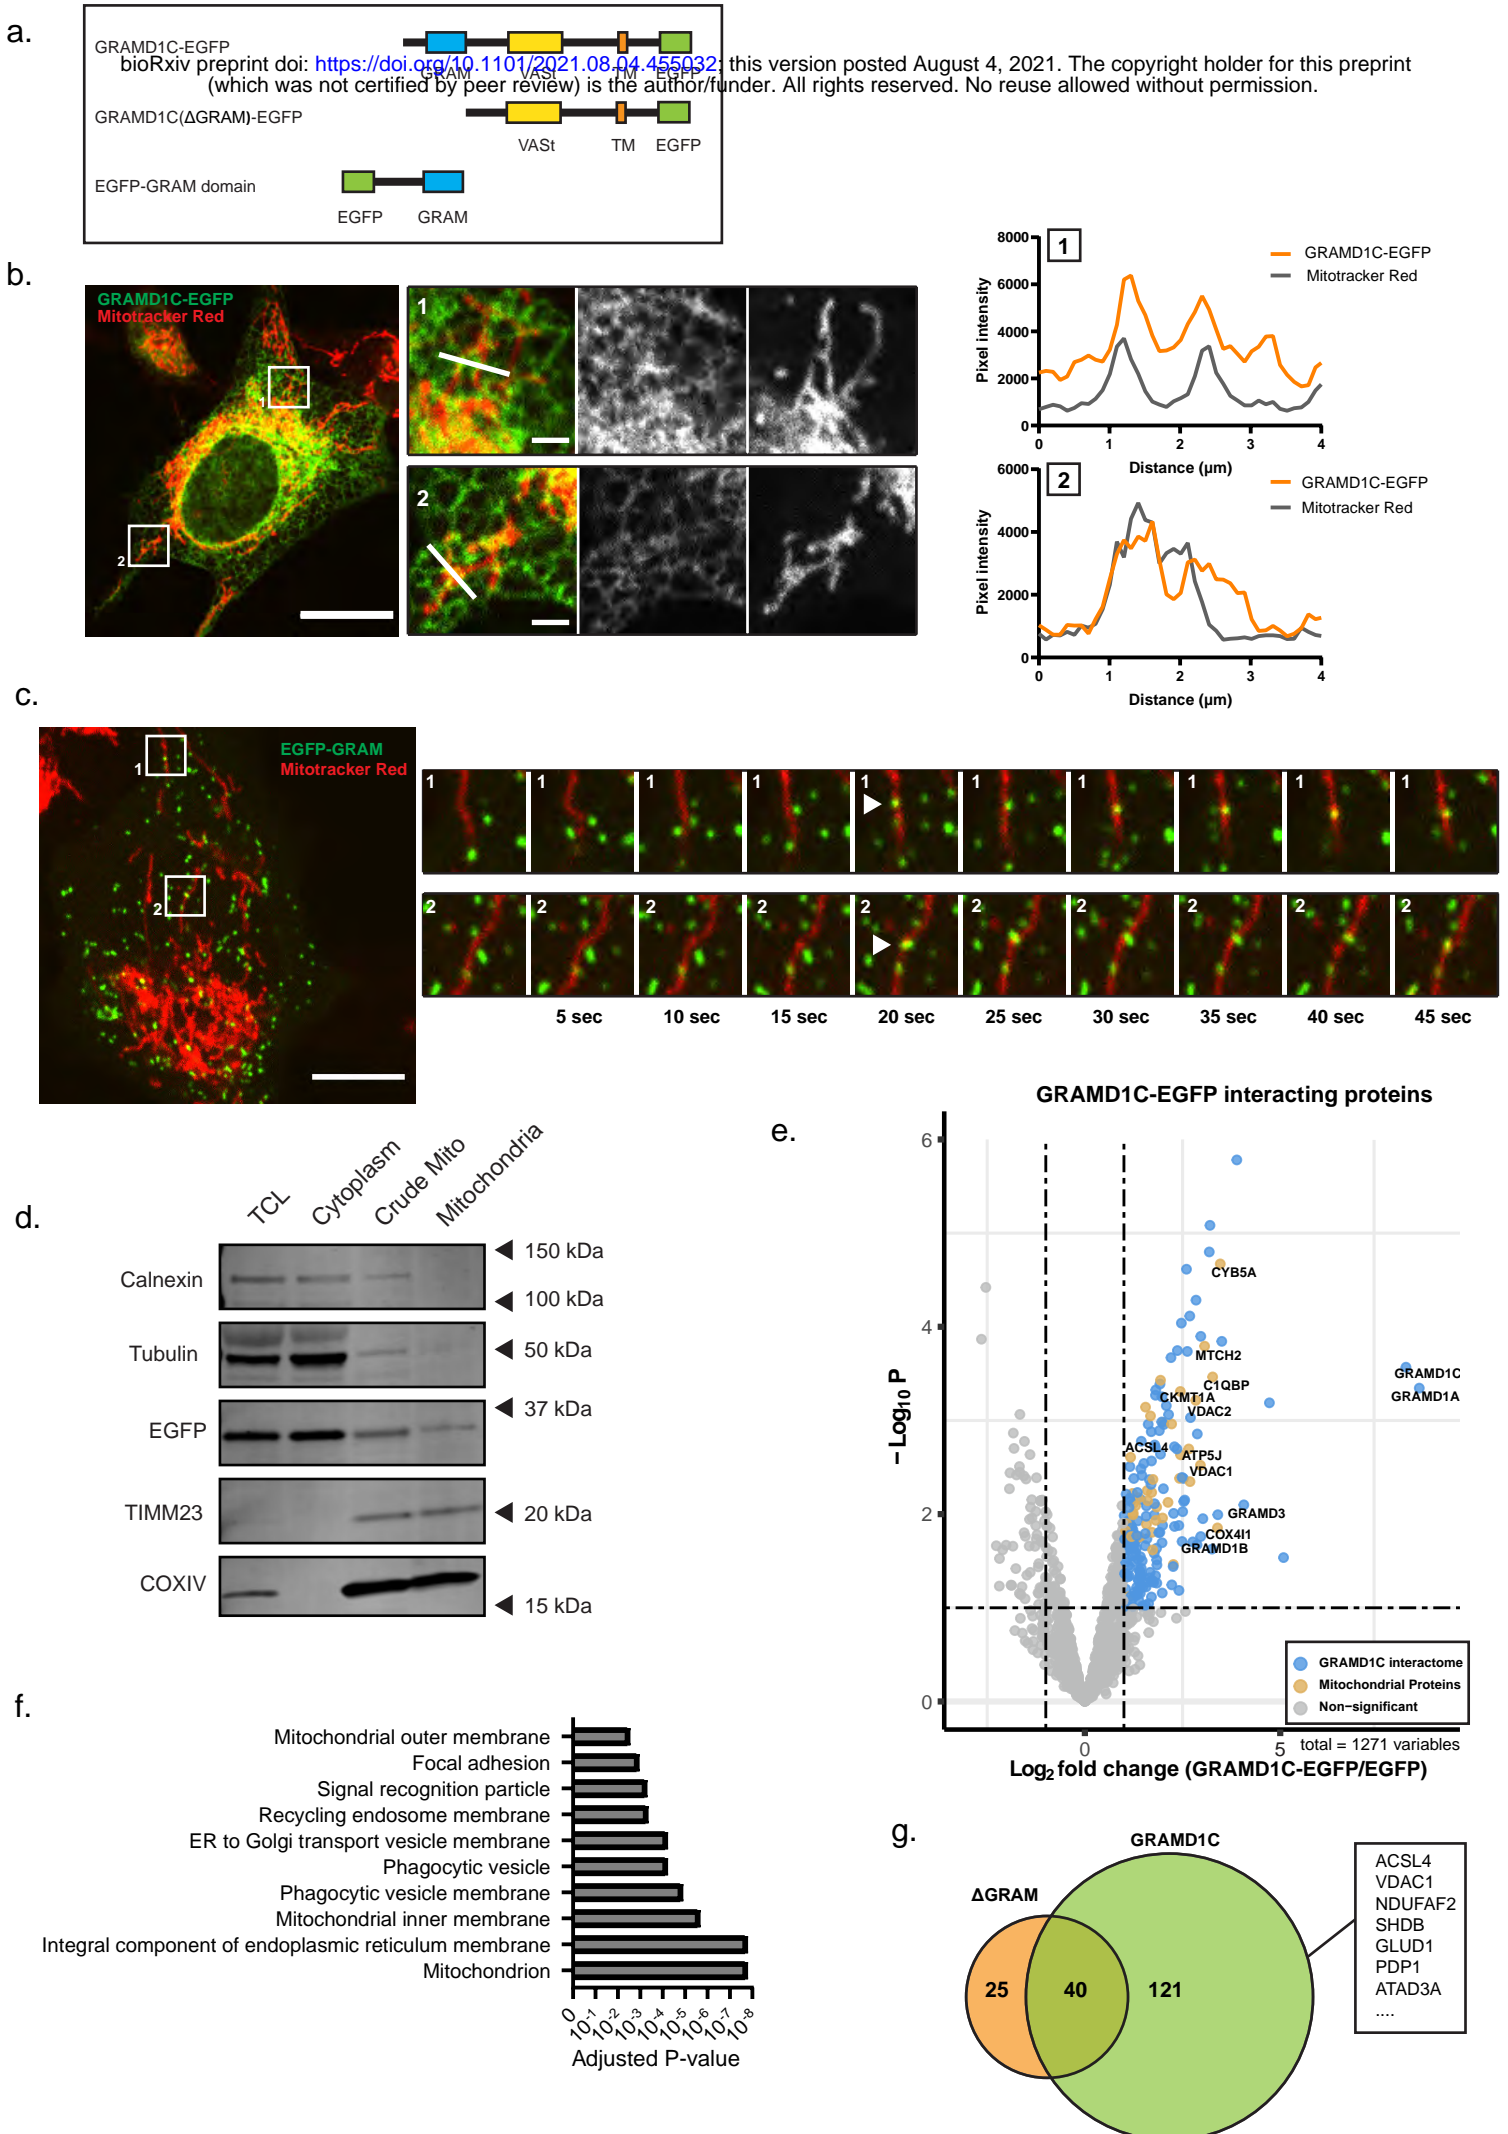

### Figure 5 - GRAMD1C interacts with the mitochondria through the GRAM domain

**a** Overview of the EGFP-tagged GRAMD1C constructs used. **b** U2OS cells stably expressing GRAMD1C-EGFP were stained with Mitotracker Red and subjected to live cell confocal microscopy. The graph depicts the pixel intensity along the white line drawn in the inset. Scale Bar = 20  $\mu\text{m}$ , inset = 2  $\mu\text{m}$ . **c** U2OS cells stably expressing EGFP-GRAM domain were stained with Mitotracker Red and subjected to live cell confocal microscopy. The insets represent snapshots showing recruitment of EGFP-GRAM to mitochondria. Scale Bar = 10  $\mu\text{m}$ . **d** Mitochondria were isolated using percoll density centrifugation from U2OS cells expressing EGFP-GRAM and subjected to western blot analysis for the indicated proteins. TLC: total cell lysate. **e** GRAMD1C-EGFP was immunopurified and co-purified proteins were identified using mass spectrometry analysis. The interactome of GRAMD1C-EGFP was compared to the interactome of EGFP. Significant hits ( $p < 0.05$ ) are colored blue or brown (mitochondrial). **f** GO cellular compartment enrichment of proteins co-purified with GRAMD1C-EGFP. **g** Venn diagram of interacting proteins of GRAMD1C-EGFP and GRAMD1C( $\Delta$ GRAM)-EGFP. The proteins listed are examples of mitochondrial and mitochondria-ER contact site proteins.

# Figure 6

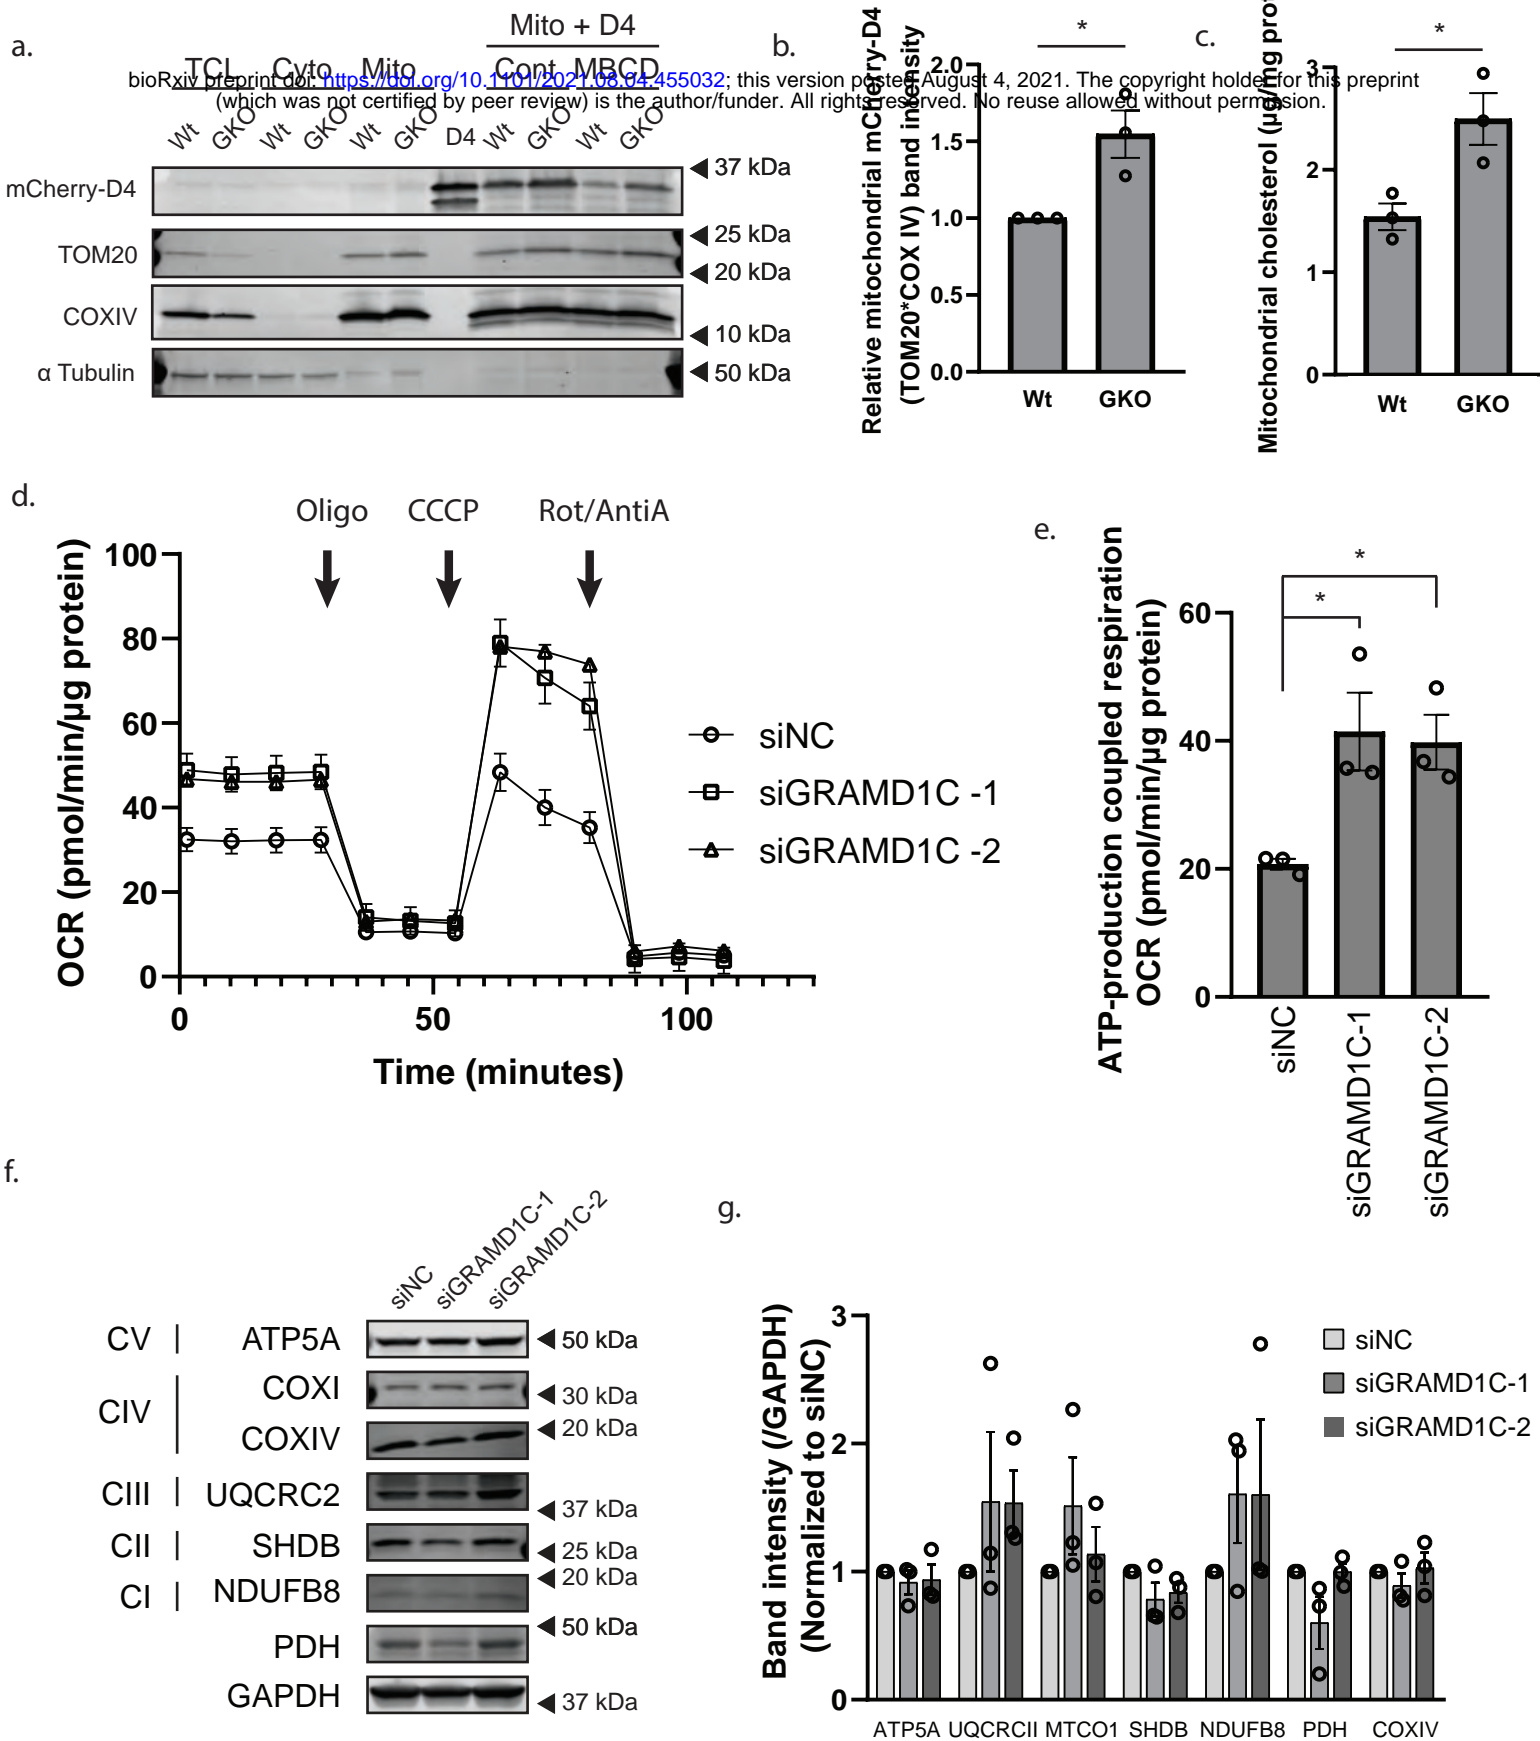

## Figure 6 - GRAMD1C regulates mitochondrial bioenergetics

**a** Wt and GRAMD1C knockout (GKO) cells expressing 3XHA-EGFP-OMP25 were treated or not with MBCD, followed by isolation of mitochondria using affinity purification of the HA-tagged OMP25 from a total cell lysate (TCL). The isolated mitochondria were incubated with the cholesterol probe mCherry-D4 (recombinant protein shown in lane 7), before washing and western blot analysis with the indicated antibodies. **b** Quantification of mCherry-D4 band intensity in the isolated mitochondria fractions from a. relative to the average band intensity of the mitochondrial proteins TOM20 and COXIV and normalized to wt cells. Significance was determined using Student's T-test from  $n = 3$  experiments. Error bar = SEM. **c** Mitochondria from Wt or GKO cells were isolated and mitochondrial lipids were extracted. The lipids were then oxidized with cholesterol oxidase, which generates  $H_2O_2$  that reacts with a colorimetric probe. Absorbance changes corresponding to cholesterol abundance were normalized to mitochondrial protein concentration. Significance was determined using Student's T-test from  $n = 3$  experiments. Error bar = SEM. **d** Mitochondrial oxygen consumption was analyzed in control and GRAMD1C knocked down cells using the Seahorse analyzer. Oxygen consumption was measured after gradual addition of Oligomycin, CCCP and Rotenone/Antimycin A. **e** ATP-linked respiration is calculated from the difference between the maximal respiratory capacity and the proton leak. Significance was determined using 1-way ANOVA followed by Bonferroni's comparison test from  $n = 3$  experiments. Error bar = SEM. **f** Cell lysates from control (siNC) and siGRAMD1C treated cells were subjected to western blot analysis with antibodies against the indicated OXPHOS components. **g** The graph represents the quantification of band intensities of data in f. relative to GAPDH and normalized to siNC. Significance was determined with 1-way ANOVA followed by Tukey's comparison test from  $n = 3$  experiments. Error bar = SEM. \*\*\*\* =  $p < 0.0001$ , \*\*\* =  $p < 0.001$ , \*\* =  $p < 0.01$  and N.S. = not significant.

# Figure 7

a.

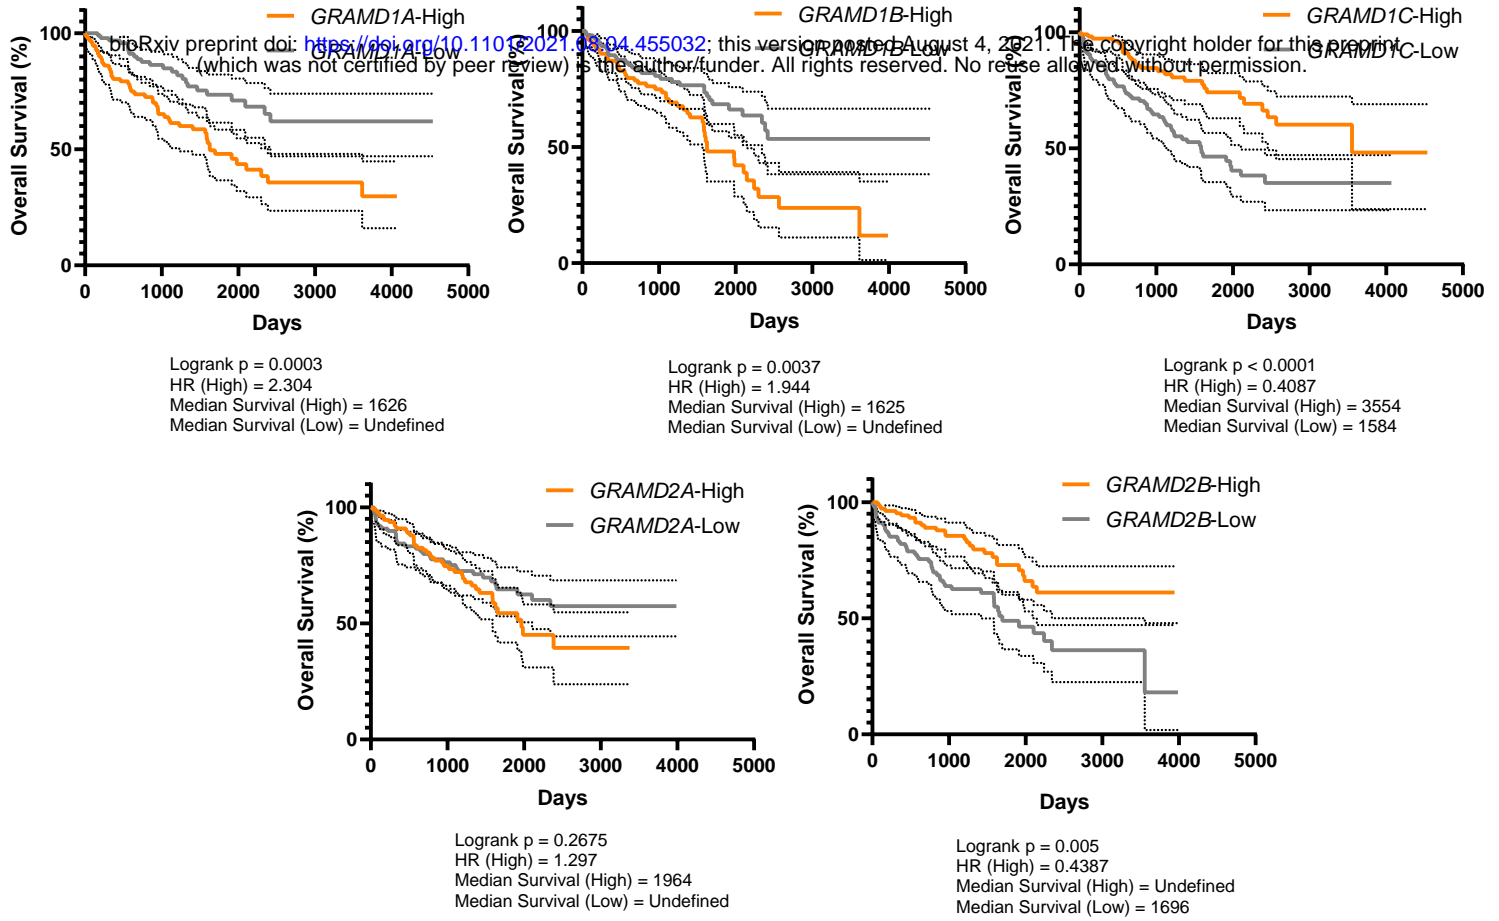

b.

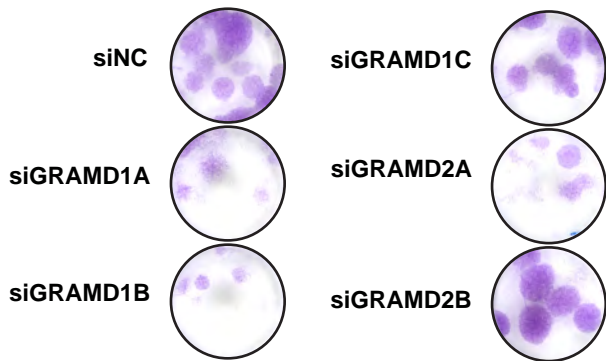

c.

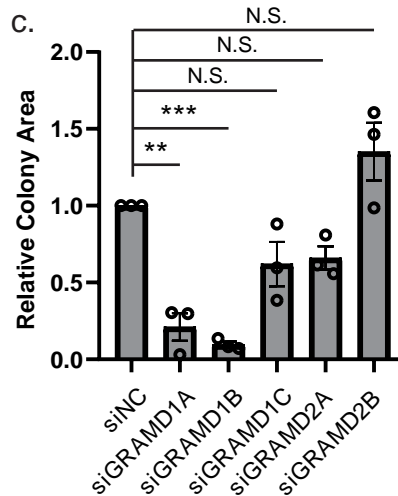

d.

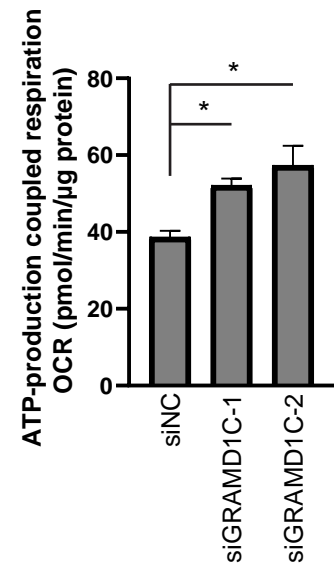

e.

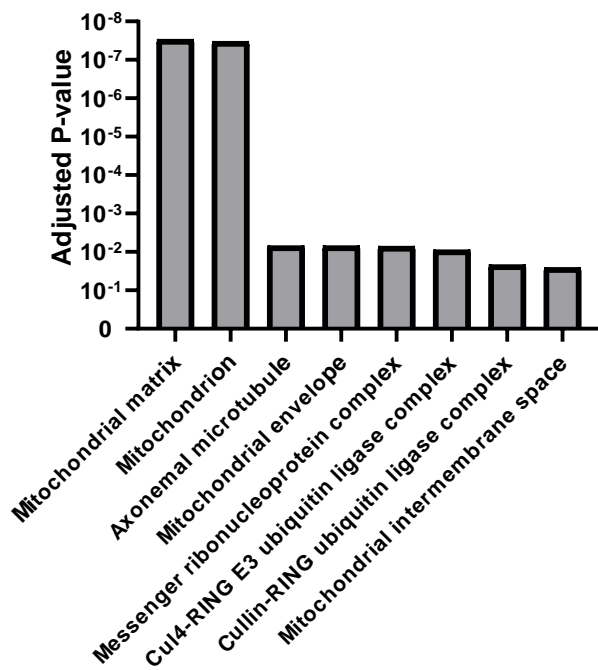

f.

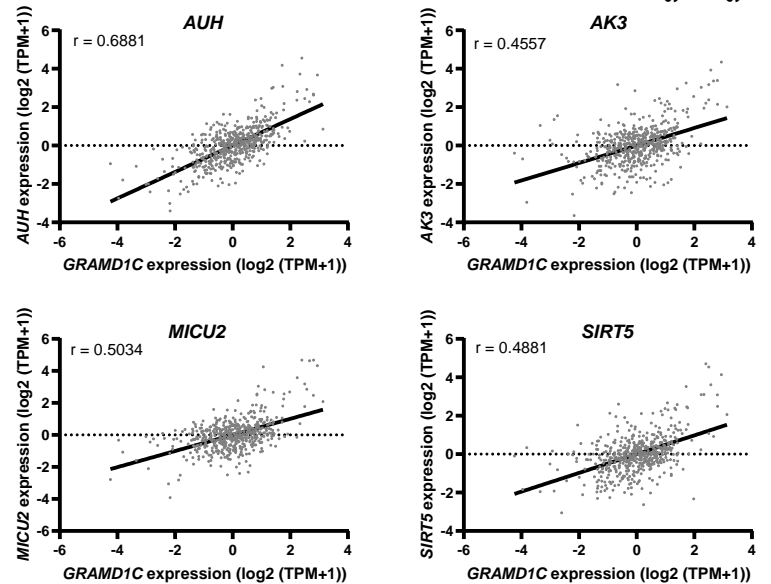

### Figure 7 - The GRAMs are involved in ccRCC survival

**a** Samples from the KIRC TCGA study were stratified based on *GRAM* expression. Overall survival of samples with high *GRAM* expression (Upper quartile, orange line) were compared to low *GRAM* expression (Lower quartile, gray line). The dotted lines represent 95% confidence interval. P-values were obtained using Log-rank (Mantel-Cox) test. **b** For the colony formation assay, 786-O cells were treated with the indicated siRNAs and incubated for 3 weeks prior to fixation and staining with crystal violet stain. **c** Colony area was quantified and normalized to siNC. Significance was determined using 1-way ANOVA followed by Dunnett's comparison test from  $n = 3$  experiments. **d** ATP-linked respiration, calculated from the difference between the maximal respiratory capacity and the proton leak from Seahorse analysis, in 786-O cells treated with control (siNC) or siRNA against *GRAMD1C* for 72 hrs. Significance was determined using 1-way ANOVA followed by Dunnett's comparison test. Error bar = SEM. **e** Top 100 co-expressed genes of *GRAMD1C* in the KIRC TCGA dataset were downloaded from GEPIA2.cancer-pku.cn, and subjected to GO Cellular Compartment enrichment using Enrichr<sup>83,84</sup>. **f** Top four co-expressed mitochondrial genes with *GRAMD1C* in the KIRC TCGA cohort plotted against the expression of *GRAMD1C*. \*\*\* =  $p < 0.001$ , \*\* =  $p < 0.01$  and N.S. = not significant.

### Table I - GRAMD1C interactome

Proteins enriched from co-immunoprecipitation of GRAMD1C-EGFP (Table 1a) and GRAMD1C ( $\Delta$ GRAM)-EGFP (Table 1b) were compared against proteins enriched from co-immunoprecipitation of EGFP tag alone. The log fold change (LogFC), P-values and protein IDs of the significant proteins are described.

### Table II - The proteome of GRAMD1C depleted cells

Proteins identified from siGRAMD1C treated cells were compared against proteins from siNC treated cells. The log fold change (LogFC), P-values and protein IDs of the significant proteins are described.
